# Supplementary material for: Supershed Escherichia coli O157:H7 Has Potential for Increased Persistence on the Rectoanal Junction Squamous Epithelial Cells and Antibiotic Resistance
Source: Hindawi journal article supplement (doi:10.1155/2020/2368154), 2020-04-14
Supplement: f1 [file 2368154.f1.zip]

**Table S1.** Zone of inhibition diameters (mm) used to determine AST profiles of control *Escherichia coli* (ATCC®25922™) and all bacterial isolates tested in this assay.

| Antibiotic                    | Disc Code | Antibiotic Concentration | Control Strain Zone Diameter | Test Zone diameters (mm) |              |             |
|-------------------------------|-----------|--------------------------|------------------------------|--------------------------|--------------|-------------|
|                               |           | (µg)                     | (mm)                         | Resistant                | Intermediate | Susceptible |
| Amoxicillin/Clavulanic acid   | AmC-30    | 20/10                    | 18—24                        | ≤ 13                     | 14—17        | ≥ 18        |
| Ampicillin                    | AM-10     | 10                       | 16—22                        | ≤ 13                     | 14—16        | ≥ 17        |
| Azithromycin                  | AZM-15    | 15                       | 14—21                        | ≤ 13                     | 14—17        | ≥ 18        |
| Cefoxitin                     | FOX-30    | 30                       | 23—29                        | ≤ 14                     | 15—17        | ≥ 18        |
| Ceftiofur                     | XNL-30    | 30                       | 26—31                        | ≤ 14                     | 15—20        | ≥ 21        |
| Ceftriaxone                   | CRO-30    | 30                       | 29—35                        | ≤ 13                     | 14—20        | ≥ 21        |
| Chloramphenicol               | C-30      | 30                       | 21—27                        | ≤ 12                     | 13—17        | ≥ 18        |
| Ciprofloxacin                 | CIP-5     | 5                        | 30—40                        | ≤ 15                     | 16—20        | ≥ 21        |
| Colistin                      | CL-10     | 10                       | 11—15                        | ≤ 08                     | 09—10        | ≥ 11        |
| Fosfomycin                    | FOS200    | 200                      | 22—30                        | ≤ 12                     | 13—15        | ≥ 16        |
| Gentamicin                    | GM-10     | 10                       | 19—26                        | ≤ 12                     | 13—14        | ≥ 15        |
| Nalidixic Acid                | NA-30     | 30                       | 22—28                        | ≤ 13                     | 14—18        | ≥ 19        |
| Polymyxin B (Units)           | PB-300    | 300                      | 13—19                        | ≤ 08                     | 09—11        | ≥ 12        |
| Streptomycin                  | S-10      | 10                       | 12—20                        | ≤ 11                     | 12—14        | ≥ 15        |
| Sulfamethoxazole/Trimethoprim | SXT       | 23.75/1.25               | 23—29                        | ≤ 10                     | 11—15        | ≥ 16        |
| Sulfisoxazole                 | G-.25     | 0.25                     | 15—23                        | ≤ 12                     | 13—16        | ≥ 17        |
| Tetracycline                  | TE-30     | 30                       | 18—25                        | ≤ 14                     | 15—18        | ≥ 19        |

<sup>a</sup> Adapted from M100, Performance Standards for Antimicrobial Susceptibility Testing; 27<sup>th</sup> Edition, (Published by Clinical and Laboratory Standards Institute, CLSI 2017, Pennsylvania, USA)

**Table S2.** CLSI break points for determining MIC ( $\mu\text{g/mL}$ ) profiles of control *Escherichia coli* (ATCC®25922™) and all bacterial isolates tested in this assay.

| MIC Strips (Biomereix, E-test®) | Strip Code<br>(E-test) | Antibiotic Concentration<br>( $\mu\text{g}$ ) | Control Strain MIC Range<br>( $\mu\text{g/mL}$ ) | Interpretive Breakpoints for test <i>E. coli</i> MIC ( $\mu\text{g/mL}$ ) |              |
|---------------------------------|------------------------|-----------------------------------------------|--------------------------------------------------|---------------------------------------------------------------------------|--------------|
|                                 |                        |                                               |                                                  | Susceptible                                                               | Resistant    |
| Amoxicillin/ Clavulanic acid    | XL                     | 0.016-256 $\mu\text{g}$                       | 2/1--8/4                                         | $\leq 8/4$                                                                | $\geq 32/16$ |
| Ampicillin                      | AM                     | 0.016-256 $\mu\text{g}$                       | 2—8                                              | $\leq 8$                                                                  | $\geq 32$    |
| Azithromycin <sup>b</sup>       | AZ                     | 0.016-256 $\mu\text{g}$                       | 0.5—2                                            | $\leq 2$                                                                  | $\geq 8$     |
| Cefoxitin                       | FX                     | 0.016-256 $\mu\text{g}$                       | 2—8                                              | $\leq 8$                                                                  | $\geq 32$    |
| Ceftiofur/Cefotaxime            | CT                     | 0.002- 32 $\mu\text{g}$                       | 0.03--0.12                                       | $\leq 2$                                                                  | $\geq 8$     |
| Ceftriaxone                     | TX                     | 0.016-256 $\mu\text{g}$                       | 0.03--0.12                                       | $\leq 8$                                                                  | $\geq 64$    |
| Chloramphenicol                 | CL                     | 0.016-256 $\mu\text{g}$                       | 2—8                                              | $\leq 8$                                                                  | $\geq 32$    |
| Ciprofloxacin                   | CI                     | 0.002- 32 $\mu\text{g}$                       | 0.004--0.015                                     | $\leq 0.06$                                                               | $\geq 0.12$  |
| Colistin <sup>c</sup>           | CO                     | 0.016-256 $\mu\text{g}$                       | 0.5 – 4                                          | $\leq 2$                                                                  | $\geq 8$     |
| Fosfomycin                      | FM                     | 0.064-1024 $\mu\text{g}$                      | 0.5 -- 2.0                                       | $\leq 64$                                                                 | $\geq 256$   |
| Gentamicin                      | GM                     | 0.016-256 $\mu\text{g}$                       | 0.25 -- 1.0                                      | $\leq 4$                                                                  | $\geq 8$     |
| Nalidixic Acid                  | NA                     | 0.016-256 $\mu\text{g}$                       | 1 – 4                                            | $\leq 8$                                                                  | $\geq 32$    |
| Polymyxin B <sup>c</sup>        | PO                     | 0.064-1024 $\mu\text{g}$                      | 0.25 -- 2.0                                      | $\leq 2$                                                                  | $\geq 8$     |
| Streptomycin <sup>d</sup>       | SM                     | 0.064-1024 $\mu\text{g}$                      | 8 – 32                                           | $\leq 4$                                                                  | $\geq 16$    |
| Trimethoprim/Sulfamethoxazole   | TS                     | 0.016-256 $\mu\text{g}$                       | $\leq 0.5/9.5$                                   | $\leq 2/38$                                                               | $\geq 4/76$  |
| Sulfisoxazole                   | SX                     | 0.064-1024 $\mu\text{g}$                      | 8 – 32                                           | $\leq 256$                                                                | $\geq 512$   |
| Tetracycline                    | TE                     | 0.016-256 $\mu\text{g}$                       | 0.5 -- 2.0                                       | $\leq 4$                                                                  | $\geq 16$    |

<sup>a</sup> Adapted from M100, Performance Standards for Antimicrobial Susceptibility Testing; 27<sup>th</sup> Edition, (Published by Clinical and Laboratory Standards Institute, CLSI 2017, Pennsylvania, USA)

<sup>b</sup> The acceptable range for *Staphylococcus aureus* ATCC®25923™ against Azithromycin have been shown

<sup>c</sup> The acceptable range for *Pseudomonas aeruginosa* ATCC®27853™ against Colistin and Polymyxin B have been shown

<sup>d</sup> Breakpoints for *Yersinia pestis*; plates have to be incubated for 24 hours before reading the MIC of Streptomycin in *E. coli* isolates

**Table S3.** Primers used in this study

| Genes <sup>a</sup>          | Forward                   | Reverse                  | Amplicon Size (bp) | Tm | Reference/Gene <sup>b</sup> |
|-----------------------------|---------------------------|--------------------------|--------------------|----|-----------------------------|
| <i>aac(3)-IV</i>            | CTTCAGGATGGCAAGTTGGT      | TCATCTCGTTCTCCGCTCAT     | 286                | 58 | 90                          |
| <i>aadA1</i>                | TATCCAGCTAAGCGCGAACT      | ATTTGCCGACTACCTTGGTC     | 447                | 58 | 90                          |
| <i>acrB</i>                 | GTTGTTCCATCAGCTCCATT      | GACCAGGGCGTATTTATGAC     | 838                | 56 | Accession # LR134031.1      |
| <i>Ais</i>                  | CCACATGCATGACTAAACCA      | TCGTTCAACCAATCAATGCT     | 362                | 56 | Accession # CP037941.1      |
| <i>arnA</i>                 | GTTTAACTGGATGGGACCAC      | GTTCTCAGGATTGCCAATGT     | 241                | 56 | Accession # LR134092.1      |
| <i>bla<sub>CTX-M</sub></i>  | TTTGCGATGTGCAGTACCAGTAA   | CGATATCGTTGGTGGTGCCATA   | 544                | 51 | 91                          |
| <i>bla<sub>TEM</sub></i>    | GAGTATTCAACATTTTCGT       | ACCAATGCTTAATCAGTGA      | 857                | 58 | 90                          |
| <i>catA1</i>                | AGTTGCTCAATGTACCTATAACC   | TTGTAATTCATTAAGCATTCTGCC | 547                | 55 | 90                          |
| <i>dfrA1</i>                | GGAGTGCCAAAGGTGAACAGC     | GAGGCGAAGTCTTGGGTAAAAAC  | 367                | 50 | 92                          |
| <i>dhfrI</i>                | AAGAATGGAGTTATCGGGAATG    | GGGTAAAAACTGGCCTAAAATTG  | 391                | 58 | 90                          |
| <i>emrA</i>                 | GAAGAAACCGATGACGCATA      | GGTTAGTGGTATTGACGCTC     | 901                | 56 | Accession # CP020495.1      |
| <i>Fsr</i>                  | ATCAGGCAGGAATATGGTCA      | TTTTTCGGTTTTGCTTTTCGG    | 141                | 56 | Accession # LR134092.1      |
| <i>int (Integrase)</i>      | TGCTGGTACATCCTAATGGT      | CAGGCGAGAAAGATCAAGAG     | 545                | 56 | Accession # AP018488.1      |
| <i>macA</i>                 | GTGATTTACAGCAAAGCGTG      | CAGCACATTTTTTCACATCGG    | 791                | 56 | Accession # CP020495.1      |
| <i>marA</i>                 | GGGTACTCTAAATGGCACC       | GTATCGGCTCGTTACTTTCC     | 128                | 56 | Accession # CP035366.1      |
| <i>mcr1</i>                 | CGTATCATTGGTTTGGGTGT      | GATCAGCATATCTTTGCCGT     | 780                | 56 | Accession # CP035313.1      |
| <i>mcr1</i>                 | GCTGATTTTACTGCCTGTGG      | TACGCATATCAGGCTTGTT      | 250                | 55 | Drs. Ricker & Allen         |
| <i>mcr1 (full length)</i>   | ATGATGCAGCATACTTCTGTG     | TCAGCGGATGAATGCGGTG      | 1626               | 60 | 43                          |
| <i>mcr2</i>                 | TGGTACAGCCCCCTTTATT       | GCTTGAGATTGGGTATGA       | 538                | 56 | 93                          |
| <i>mdtH</i>                 | GCTAAACCCCATATAGCTGC      | AGCGTTTTGTACCTATGTC      | 392                | 56 | Accession # LR134092.1      |
| <i>mdtO</i>                 | GCCTGAGAATCAGCAAAAGA      | GTATCGTTGTTGGCCTCTAC     | 328                | 56 | Accession # CP020495.1      |
| <i>mph(A)</i>               | AACTGTACGC ACTTGC         | GGTACTCTTCGTTACC         | 837                | 52 | 94                          |
| <i>pmrD</i>                 | TTTTCCCTGCCACTTTACAC      | AAAATGATCGCCGAAGTGAA     | 175                | 56 | Accession # LR134092.1      |
| <i>qnrA</i>                 | GGGTATGGATATTATTGATAAAG   | CTAATCCGGCAGCACTATTTA    | 670                | 50 | 95                          |
| <i>rarD</i>                 | GCCGTAGAAGGCCAAACTAA      | CGTGATCTGGTCGTTTTTCT     | 370                | 56 | Accession # BA000007.3      |
| <i>stx1 (Shiga toxin 1)</i> | ATAAATCGCCATTTCGT TGACTAC | AGAACGCCCACTGAGATCATC    | 180                | 61 | 96                          |
| <i>stx2 (Shiga toxin 2)</i> | GGCACTGTCTGAAACTGCTCC     | TCGCCAGTTATCTGACAT TCTG  | 255                | 65 | 96                          |
| <i>sul1</i>                 | CCAAGGATTTCTGACCCTG       | GGGTTTCCGAGAAGGTGATT     | 479                | 58 | Accession # MH765658.1      |
| <i>sul2</i>                 | GCTCATCATTTTCGGCATCG      | TTCGCCAATTGCGGATAGAA     | 348                | 58 | Accession # MH765656.1      |
| <i>sul3</i>                 | TGGTGTAAGCGTGAACGAA       | TTAACATCATGGGTGCGGAG     | 264                | 58 | Accession # MH765654.1      |
| <i>tetA</i>                 | GGCCTCAATTTCTGACG         | AAGCAGGATGTAGCCTGTGC     | 372                | 59 | 97                          |
| <i>tetA (full length)</i>   | GTGAAACCCAACAGACCCCTGA    | CCGTTCCACGTTGTTATAGAAGC  | 1103               | 61 | Accession # MK461931.1      |
| <i>tetB</i>                 | GAGACGCAATCGAATTCGG       | TTTAGTGGCTATTCTTCCTGCC   | 228                | 60 | 97                          |
| <i>tetC</i>                 | TGCTCAACGGCCTCAACC        | AGCAAGACGTAGCCCAGCG      | 379                | 63 | 97                          |
| <i>yfbH</i>                 | GTGAAGCCACAGTTTTTGTG      | ATGAATGGTATAAACCGGCG     | 543                | 56 | Accession # CP020495.1      |
| <i>yjcP</i>                 | GGTAATGCCACTGGTTTGAT      | TTCACAATTACAGGTCGCAG     | 540                | 56 | Accession # CP035366.1      |
| <i>yjcR</i>                 | TAGAACGAGAACTTTCGGC       | AGCAAATTATGCTCACCAG      | 621                | 56 | Accession # CP035366.1      |

<sup>a</sup> AR genes: *aac(3)-IV* = Aminoglycoside resistance; *aadA1* = Streptomycin resistance; *acrB* = Acriflavine, aminoglycoside and multidrug resistance efflux pump; *ais* = Polymyxin resistance protein, histidine phosphatase family protein; *arnA* = Polymyxin resistance protein; *bla<sub>CTX-M</sub>* = Cephalosporin resistance; *bla<sub>TEM</sub>* = Ampicillin resistance; *catA1* = Chloramphenicol resistance; *dfrA1* = Trimethoprim resistance; *dhfrI* = Trimethoprim resistance; *emrA* = Multidrug resistance protein A; *fsr* = Fosfomycin resistance; *macA* = Macrolide-specific efflux protein; *marA* = Multiple antibiotic resistance protein; *mcr1* = Colistin resistance; *mcr2* = Colistin resistance; *mdtH* = Multidrug resistance protein; *mdtO* = Multidrug resistance protein; *mph(A)* = Macrolides resistance; *pmrD* = Polymyxin B resistance; *qnrA* = Quinolones resistance; *rarD* = Chloramphenicol resistance; *sul1* = Sulfonamide resistance; *tetA*, *tetB*, *tetC* = Tetracycline resistance; *yfbH* = Polymyxin resistance; *yjcP* = Outer membrane component of tripartite multidrug resistance system; *yjcR* = Inner membrane component of tripartite multidrug resistance system

<sup>b</sup> Primers were derived either from those reported in the literature or from gene sequences available in GenBank.

**Table S4.** PATS profiles of SS-O157 (n=101) isolates.

| SS-O157 | Polymorphic <i>Xba</i> I sites <sup>a</sup> |      |       |       |       |       |      |      | Polymorphic <i>Avr</i> II sites <sup>a</sup> |       |        |        |        |        | Virulence Genes <sup>a</sup> |              |              |            |              |
|---------|---------------------------------------------|------|-------|-------|-------|-------|------|------|----------------------------------------------|-------|--------|--------|--------|--------|------------------------------|--------------|--------------|------------|--------------|
|         | IK8                                         | IK25 | IK114 | IK118 | IK123 | IK127 | IKB3 | IKB5 | IKNR3                                        | IKNR7 | IKNR10 | IKNR12 | IKNR16 | IKNR27 | IKNR33                       | <i>stx</i> 1 | <i>stx</i> 2 | <i>eae</i> | <i>hly</i> A |
| C1      | 0                                           | 0    | 1     | 1     | 1     | 0     | 0    | 0    | 0                                            | 2     | 2      | 2      | 1      | 2      | 2                            | 0            | 1            | 1          | 1            |
| C2      | 1                                           | 0    | 0     | 1     | 1     | 1     | 0    | 0    | 1                                            | 2     | 2      | 2      | 1      | 0      | 2                            | 0            | 1            | 1          | 1            |
| C3      | 1                                           | 0    | 1     | 0     | 1     | 1     | 0    | 1    | 2                                            | 2     | 2      | 2      | 2      | 2      | 2                            | 1            | 1            | 1          | 1            |
| C4      | 0                                           | 0    | 1     | 1     | 0     | 1     | 0    | 1    | 2                                            | 2     | 2      | 0      | 2      | 2      | 2                            | 1            | 1            | 1          | 1            |
| C5      | 0                                           | 0    | 1     | 1     | 1     | 1     | 1    | 0    | 2                                            | 2     | 2      | 2      | 1      | 2      | 2                            | 0            | 1            | 1          | 1            |
| C6      | 0                                           | 0    | 0     | 1     | 1     | 1     | 1    | 0    | 2                                            | 2     | 2      | 2      | 1      | 2      | 2                            | 0            | 1            | 1          | 1            |
| C7      | 0                                           | 0    | 1     | 1     | 1     | 1     | 1    | 0    | 2                                            | 2     | 2      | 2      | 1      | 2      | 2                            | 0            | 1            | 1          | 1            |
| C9      | 1                                           | 0    | 0     | 1     | 1     | 1     | 0    | 0    | 1                                            | 0     | 2      | 0      | 1      | 2      | 0                            | 1            | 0            | 1          | 1            |
| C11     | 1                                           | 0    | 1     | 1     | 1     | 1     | 1    | 1    | 2                                            | 0     | 2      | 0      | 2      | 2      | 2                            | 1            | 1            | 1          | 1            |
| C16     | 0                                           | 0    | 0     | 1     | 1     | 1     | 0    | 0    | 0                                            | 0     | 2      | 0      | 1      | 2      | 2                            | 0            | 1            | 1          | 1            |
| C17     | 1                                           | 0    | 1     | 1     | 1     | 1     | 0    | 0    | 2                                            | 0     | 2      | 0      | 1      | 2      | 2                            | 0            | 1            | 1          | 0            |
| C22     | 1                                           | 0    | 1     | 1     | 1     | 1     | 1    | 0    | 2                                            | 2     | 2      | 2      | 1      | 0      | 2                            | 0            | 1            | 1          | 1            |
| C25     | 0                                           | 0    | 1     | 1     | 1     | 1     | 0    | 0    | 0                                            | 2     | 2      | 2      | 1      | 2      | 2                            | 1            | 1            | 1          | 1            |
| C26     | 1                                           | 0    | 1     | 1     | 1     | 1     | 0    | 1    | 2                                            | 1     | 1      | 2      | 2      | 2      | 2                            | 1            | 1            | 1          | 1            |
| C27     | 0                                           | 0    | 1     | 1     | 0     | 1     | 0    | 1    | 2                                            | 2     | 2      | 2      | 2      | 2      | 2                            | 1            | 1            | 1          | 1            |
| C31     | 0                                           | 0    | 1     | 1     | 1     | 1     | 1    | 1    | 2                                            | 2     | 2      | 2      | 1      | 2      | 2                            | 0            | 1            | 1          | 1            |
| C37     | 1                                           | 0    | 1     | 1     | 1     | 1     | 0    | 1    | 2                                            | 2     | 2      | 2      | 2      | 2      | 2                            | 0            | 1            | 1          | 1            |
| C39     | 1                                           | 0    | 1     | 1     | 1     | 1     | 1    | 1    | 2                                            | 2     | 2      | 2      | 1      | 2      | 2                            | 0            | 1            | 1          | 1            |
| C44     | 1                                           | 0    | 1     | 1     | 1     | 0     | 0    | 0    | 1                                            | 2     | 2      | 2      | 1      | 2      | 2                            | 1            | 1            | 1          | 0            |
| C46     | 0                                           | 1    | 1     | 1     | 0     | 0     | 0    | 0    | 0                                            | 2     | 2      | 2      | 1      | 2      | 2                            | 0            | 1            | 1          | 1            |
| C48     | 1                                           | 0    | 0     | 1     | 0     | 1     | 0    | 1    | 1                                            | 2     | 2      | 2      | 1      | 2      | 0                            | 0            | 1            | 1          | 1            |
| C50     | 1                                           | 0    | 1     | 1     | 0     | 1     | 0    | 1    | 2                                            | 2     | 2      | 2      | 2      | 2      | 2                            | 1            | 1            | 1          | 1            |
| C55     | 1                                           | 0    | 1     | 0     | 1     | 1     | 0    | 0    | 2                                            | 2     | 2      | 2      | 1      | 2      | 2                            | 0            | 1            | 1          | 1            |
| C56     | 1                                           | 0    | 1     | 0     | 1     | 1     | 0    | 0    | 1                                            | 2     | 2      | 2      | 1      | 2      | 2                            | 0            | 1            | 1          | 1            |
| C59     | 1                                           | 0    | 0     | 1     | 1     | 1     | 0    | 0    | 0                                            | 2     | 2      | 2      | 1      | 2      | 0                            | 0            | 1            | 1          | 1            |
| C64     | 1                                           | 0    | 1     | 1     | 1     | 0     | 1    | 1    | 2                                            | 2     | 2      | 2      | 2      | 2      | 2                            | 1            | 1            | 1          | 1            |
| C68     | 1                                           | 0    | 1     | 1     | 1     | 1     | 0    | 0    | 2                                            | 2     | 2      | 2      | 2      | 2      | 2                            | 1            | 1            | 1          | 1            |
| C69     | 1                                           | 0    | 1     | 1     | 1     | 1     | 0    | 1    | 2                                            | 0     | 2      | 2      | 2      | 2      | 2                            | 1            | 1            | 1          | 1            |
| C70     | 1                                           | 0    | 0     | 1     | 1     | 0     | 0    | 0    | 1                                            | 2     | 2      | 2      | 1      | 2      | 0                            | 1            | 0            | 1          | 1            |
| C72     | 1                                           | 0    | 0     | 1     | 1     | 1     | 0    | 0    | 1                                            | 2     | 2      | 2      | 1      | 2      | 0                            | 0            | 1            | 0          | 1            |

|                                                            |   |   |   |   |   |   |   |   |   |   |   |   |   |   |   |   |   |   |   |
|------------------------------------------------------------|---|---|---|---|---|---|---|---|---|---|---|---|---|---|---|---|---|---|---|
| C73                                                        | 1 | 1 | 1 | 1 | 1 | 1 | 1 | 0 | 2 | 2 | 2 | 2 | 1 | 2 | 2 | 0 | 1 | 1 | 1 |
| C75                                                        | 0 | 0 | 1 | 1 | 1 | 1 | 1 | 0 | 2 | 2 | 2 | 2 | 1 | 2 | 2 | 1 | 1 | 1 | 1 |
| C76                                                        | 0 | 0 | 1 | 1 | 1 | 1 | 1 | 0 | 2 | 0 | 2 | 2 | 1 | 2 | 2 | 0 | 1 | 1 | 1 |
| C79                                                        | 0 | 0 | 0 | 1 | 1 | 0 | 1 | 0 | 2 | 2 | 2 | 2 | 0 | 2 | 0 | 1 | 1 | 1 | 1 |
| C80                                                        | 1 | 0 | 1 | 0 | 1 | 1 | 0 | 1 | 1 | 2 | 2 | 2 | 1 | 2 | 2 | 0 | 1 | 1 | 1 |
| C81                                                        | 1 | 0 | 1 | 1 | 1 | 1 | 0 | 1 | 1 | 2 | 2 | 2 | 1 | 2 | 2 | 1 | 1 | 1 | 1 |
| C82                                                        | 1 | 0 | 0 | 1 | 1 | 1 | 0 | 0 | 1 | 0 | 2 | 0 | 1 | 2 | 0 | 1 | 1 | 1 | 1 |
| C88                                                        | 1 | 0 | 1 | 1 | 1 | 1 | 0 | 1 | 2 | 0 | 2 | 0 | 2 | 2 | 2 | 0 | 1 | 1 | 1 |
| C89                                                        | 1 | 0 | 1 | 1 | 1 | 1 | 1 | 0 | 2 | 2 | 0 | 2 | 1 | 2 | 2 | 0 | 1 | 1 | 1 |
| C92                                                        | 1 | 0 | 0 | 1 | 1 | 1 | 0 | 0 | 1 | 2 | 2 | 2 | 1 | 1 | 0 | 1 | 1 | 1 | 1 |
| C95                                                        | 1 | 1 | 0 | 1 | 1 | 1 | 0 | 0 | 1 | 2 | 2 | 2 | 1 | 2 | 0 | 1 | 1 | 1 | 1 |
| C96                                                        | 1 | 0 | 0 | 1 | 0 | 1 | 0 | 0 | 1 | 2 | 2 | 2 | 0 | 2 | 0 | 1 | 1 | 1 | 1 |
| C97                                                        | 1 | 0 | 1 | 1 | 1 | 1 | 1 | 1 | 2 | 0 | 0 | 2 | 2 | 2 | 2 | 1 | 1 | 0 | 1 |
| C98                                                        | 1 | 1 | 1 | 1 | 1 | 1 | 0 | 1 | 2 | 2 | 2 | 2 | 2 | 2 | 2 | 1 | 1 | 1 | 1 |
| C101                                                       | 1 | 0 | 0 | 1 | 1 | 1 | 0 | 1 | 2 | 2 | 2 | 2 | 2 | 2 | 2 | 1 | 1 | 1 | 1 |
| C102                                                       | 1 | 0 | 0 | 1 | 1 | 1 | 1 | 0 | 1 | 2 | 2 | 2 | 1 | 2 | 0 | 1 | 1 | 1 | 1 |
| C104                                                       | 1 | 0 | 1 | 1 | 1 | 1 | 1 | 1 | 1 | 2 | 2 | 2 | 1 | 2 | 2 | 1 | 1 | 1 | 1 |
| C40, C41, C94                                              | 1 | 0 | 0 | 1 | 1 | 0 | 0 | 0 | 1 | 2 | 2 | 2 | 1 | 2 | 0 | 1 | 1 | 1 | 1 |
| C28, C62, C67, C71, C85                                    | 1 | 0 | 0 | 1 | 1 | 1 | 0 | 0 | 1 | 2 | 2 | 2 | 1 | 2 | 0 | 0 | 1 | 1 | 1 |
| C19, C20, C21, C57, C60, C83, C84, C91, C93                | 1 | 0 | 0 | 1 | 1 | 1 | 0 | 0 | 1 | 2 | 2 | 2 | 1 | 2 | 0 | 1 | 1 | 1 | 1 |
| C45, C47                                                   | 1 | 0 | 1 | 1 | 1 | 0 | 0 | 0 | 0 | 2 | 2 | 2 | 1 | 2 | 2 | 0 | 1 | 1 | 1 |
| C18, C49, C78                                              | 1 | 0 | 1 | 1 | 1 | 0 | 0 | 0 | 2 | 2 | 2 | 2 | 1 | 2 | 2 | 0 | 1 | 1 | 1 |
| C61, C77                                                   | 1 | 0 | 1 | 1 | 1 | 1 | 0 | 0 | 2 | 1 | 1 | 2 | 1 | 2 | 2 | 0 | 1 | 1 | 1 |
| C8, C23, C24, C33, C43, C86, C87, C90, C100, C103          | 1 | 0 | 1 | 1 | 1 | 1 | 0 | 1 | 2 | 2 | 2 | 2 | 2 | 2 | 2 | 1 | 1 | 1 | 1 |
| C51, C53                                                   | 1 | 0 | 1 | 1 | 1 | 1 | 1 | 0 | 1 | 2 | 2 | 2 | 1 | 2 | 2 | 0 | 1 | 1 | 1 |
| C14, C15, C29, C32, C34, C35, C36, C38, C42, C54, C63, C74 | 1 | 0 | 1 | 1 | 1 | 1 | 1 | 0 | 2 | 2 | 2 | 2 | 1 | 2 | 2 | 0 | 1 | 1 | 1 |
| C12, C13, C30, C65, C66, C99                               | 1 | 0 | 1 | 1 | 1 | 1 | 1 | 1 | 2 | 2 | 2 | 2 | 2 | 2 | 2 | 1 | 1 | 1 | 1 |

<sup>a</sup> 0: no amplicon; 1: amplicon with one *Xba*I or without *Avr*II site; 2: amplicon with a functional *Avr*II site

**Table S5.** Adherence patterns of SS-O157 (n=53) isolates and control O157 (n=6) strains on RSE cells.

| Strains | Bacterial Adherence Pattern | Eukaryotic cells with adherent bacteria, in the ranges shown, for two different trials <sup>1</sup><br>(MOI <sup>2</sup> = 10 <sup>6</sup> bacteria:10 <sup>5</sup> cells) |                     |          |         | Percent Mean +/- standard error of mean, of eukaryotic cells with adherent bacteria in the ranges shown <sup>5</sup> |                      |
|---------|-----------------------------|----------------------------------------------------------------------------------------------------------------------------------------------------------------------------|---------------------|----------|---------|----------------------------------------------------------------------------------------------------------------------|----------------------|
|         |                             | Trial I                                                                                                                                                                    |                     | Trial II |         |                                                                                                                      |                      |
|         |                             | >10                                                                                                                                                                        | 1-10 <sup>(3)</sup> | >10      | 1-10    | >10                                                                                                                  | 1-10                 |
|         |                             |                                                                                                                                                                            |                     |          |         |                                                                                                                      |                      |
| C1      | Aggregative, Moderate       | 23 (80)                                                                                                                                                                    | 57 (80)             | 13 (80)  | 67 (80) | 22.5 ± 6.5                                                                                                           | <b>77.5 ± 6.5</b>    |
| C2      | Aggregative, Strong         | 70 (80)                                                                                                                                                                    | 10 (80)             | 69 (80)  | 11 (80) | <b>86.75 ± 0.75</b>                                                                                                  | 13.25 ± 0.75         |
| C4      | Aggregative, Moderate       | 2 (80)                                                                                                                                                                     | 78 (80)             | 9 (80)   | 71 (80) | 6.75 ± 4.25                                                                                                          | <b>93.25 ± 4.25</b>  |
| C5      | Aggregative, Strong         | 77 (80)                                                                                                                                                                    | 3 (80)              | 76 (80)  | 4 (80)  | <b>95.63 ± 0.625</b>                                                                                                 | 4.375 ± 0.625        |
| C6      | Aggregative, Strong         | 41 (80)                                                                                                                                                                    | 39 (80)             | 43 (80)  | 37 (80) | <b>52.5 ± 1.5</b>                                                                                                    | 47.5 ± 1.5           |
| C7      | Aggregative, Strong         | 80 (80)                                                                                                                                                                    | 0 (80)              | 78 (80)  | 2 (80)  | <b>98.75 ± 1.25</b>                                                                                                  | 1.25 ± 1.25          |
| C9      | Aggregative, Moderate       | 0 (80)                                                                                                                                                                     | 80 (80)             | 1 (80)   | 79 (80) | 0.625 ± 0.625                                                                                                        | <b>99.38 ± 0.625</b> |
| C11     | Aggregative, Moderate       | 40 (80)                                                                                                                                                                    | 40 (80)             | 28 (80)  | 52 (80) | 42.5 ± 7.5                                                                                                           | <b>57.5 ± 7.5</b>    |
| C12     | Aggregative, Strong         | 80 (80)                                                                                                                                                                    | 0 (80)              | 51 (80)  | 29 (80) | <b>82 ± 18</b>                                                                                                       | 18 ± 18              |
| C13     | Aggregative, Strong         | 63 (80)                                                                                                                                                                    | 17 (80)             | 56 (80)  | 24 (80) | <b>74.5 ± 4.5</b>                                                                                                    | 25.5 ± 4.5           |
| C14     | Aggregative, Strong         | 31 (80)                                                                                                                                                                    | 49 (80)             | 76 (80)  | 4 (80)  | <b>67 ± 28</b>                                                                                                       | 33 ± 28              |
| C15     | Aggregative, Strong         | 65 (80)                                                                                                                                                                    | 15 (80)             | 63 (80)  | 17 (80) | <b>80 ± 1</b>                                                                                                        | 20 ± 1               |
| C16     | Aggregative, Strong         | 40 (80)                                                                                                                                                                    | 40 (80)             | 60 (80)  | 20 (80) | <b>62.5 ± 12.5</b>                                                                                                   | 37.5 ± 12.57         |
| C17     | Aggregative, Strong         | 60 (80)                                                                                                                                                                    | 20 (80)             | 57 (80)  | 23 (80) | <b>73 ± 2</b>                                                                                                        | 27 ± 2               |
| C18     | Aggregative, Strong         | 41 (80)                                                                                                                                                                    | 39 (80)             | 50 (80)  | 30 (80) | <b>56.75 ± 5.75</b>                                                                                                  | 43.25 ± 5.75         |
| C22     | Aggregative, Moderate       | 28 (80)                                                                                                                                                                    | 51 (80)             | 0 (80)   | 80 (80) | 17.5 ± 17.5                                                                                                          | <b>82 ± 18</b>       |
| C23     | Aggregative, Moderate       | 28 (80)                                                                                                                                                                    | 52 (80)             | 24 (80)  | 56 (80) | 32.5 ± 2.5                                                                                                           | <b>67.5 ± 2.5</b>    |
| C28     | Aggregative, Moderate       | 21 (80)                                                                                                                                                                    | 59 (80)             | 30 (80)  | 40 (80) | 32 ± 6                                                                                                               | <b>62 ± 12</b>       |
| C31     | Aggregative, Moderate       | 14 (80)                                                                                                                                                                    | 66 (80)             | 14 (80)  | 66 (80) | 17.5 ± 0                                                                                                             | <b>82.5 ± 0</b>      |
| C32     | Aggregative, Strong         | 80 (80)                                                                                                                                                                    | 0 (80)              | 80 (80)  | 0 (80)  | <b>100 ± 0</b>                                                                                                       | 0 ± 0                |

|     |                       |         |         |         |         |                                     |                                     |
|-----|-----------------------|---------|---------|---------|---------|-------------------------------------|-------------------------------------|
| C34 | Aggregative, Strong   | 75 (80) | 5 (80)  | 77 (80) | 3 (80)  | <b>95.13 <math>\pm</math> 1.125</b> | 4.875 $\pm$ 1.125                   |
| C35 | Aggregative, Strong   | 80 (80) | 0 (80)  | 80 (80) | 0 (80)  | <b>100 <math>\pm</math> 0</b>       | 0 + 0                               |
| C36 | Aggregative, Strong   | 80 (80) | 0 (80)  | 80 (80) | 0 (80)  | <b>100 <math>\pm</math> 0</b>       | 0 + 0                               |
| C38 | Aggregative, Strong   | 80 (80) | 0 (80)  | 80 (80) | 0 (80)  | <b>100 <math>\pm</math> 0</b>       | 0 + 0                               |
| C39 | Aggregative, Strong   | 80 (80) | 0 (80)  | 80 (80) | 0 (80)  | <b>100 <math>\pm</math> 0</b>       | 0 $\pm$ 0                           |
| C40 | Aggregative, Strong   | 80 (80) | 0 (80)  | 77 (80) | 3 (80)  | <b>98.13 <math>\pm</math> 1.875</b> | 1.875 $\pm$ 1.875                   |
| C42 | Aggregative, Strong   | 80 (80) | 0 (80)  | 80 (80) | 0 (80)  | <b>100 <math>\pm</math> 0</b>       | 0 $\pm$ 0                           |
| C45 | Aggregative, Moderate | 45 (80) | 35 (80) | 15 (80) | 64 (80) | 37.5 $\pm$ 18.5                     | <b>62 <math>\pm</math> 18</b>       |
| C49 | Aggregative, Strong   | 69 (80) | 11 (80) | 74 (80) | 6 (80)  | <b>89.25 <math>\pm</math> 3.25</b>  | 10.75 $\pm$ 3.25                    |
| C53 | Aggregative, Moderate | 23 (80) | 55 (80) | 23 (80) | 53 (80) | 29 $\pm$ 0                          | <b>67.5 <math>\pm</math> 1.5</b>    |
| C54 | Aggregative, Strong   | 76 (80) | 4 (80)  | 80 (80) | 0 (80)  | <b>97.5 <math>\pm</math> 2.5</b>    | 2.5 $\pm$ 2.5                       |
| C57 | Aggregative, Strong   | 43 (80) | 37 (80) | 40 (80) | 40 (80) | <b>52 <math>\pm</math> 2</b>        | 48 $\pm$ 2                          |
| C62 | Aggregative, Strong   | 74 (80) | 6 (80)  | 59 (80) | 11 (80) | <b>83.25 <math>\pm</math> 9.25</b>  | 10.75 $\pm$ 3.25                    |
| C63 | Aggregative, Strong   | 59 (80) | 21 (80) | 44 (80) | 36 (80) | <b>64.5 <math>\pm</math> 9.5</b>    | 35.5 $\pm$ 9.5                      |
| C66 | Aggregative, Strong   | 51 (80) | 29 (80) | 65 (80) | 15 (80) | <b>72.5 <math>\pm</math> 8.5</b>    | 27.5 $\pm$ 8.5                      |
| C73 | Aggregative, Strong   | 79 (80) | 1 (80)  | 78 (80) | 2 (80)  | <b>98.13 <math>\pm</math> 0.625</b> | 1.876 $\pm$ 0.625                   |
| C74 | Aggregative, Moderate | 1 (80)  | 73 (80) | 1 (80)  | 61 (80) | 1.25 $\pm$ 0                        | <b>83.75 <math>\pm</math> 7.5</b>   |
| C76 | Aggregative, Moderate | 0 (80)  | 37 (80) | 0 (80)  | 53 (80) | 0 $\pm$ 0                           | <b>56 <math>\pm</math> 10</b>       |
| C77 | Aggregative, Moderate | 2 (80)  | 74 (80) | 0 (80)  | 76 (80) | 1.25 $\pm$ 1.25                     | <b>93.75 <math>\pm</math> 1.25</b>  |
| C78 | Aggregative, Strong   | 45 (80) | 29 (80) | 41 (80) | 38 (80) | <b>53.5 <math>\pm</math> 2.5</b>    | 42 $\pm$ 6                          |
| C80 | Aggregative, Moderate | 9 (80)  | 71 (80) | 16 (80) | 63 (80) | 15.5 $\pm$ 4.5                      | <b>84 <math>\pm</math> 5</b>        |
| C83 | Aggregative, Moderate | 17 (80) | 63 (80) | 7 (80)  | 73 (80) | 15 $\pm$ 6                          | <b>85 <math>\pm</math> 6</b>        |
| C85 | Aggregative, Moderate | 3 (80)  | 77 (80) | 0 (80)  | 80 (80) | 1.875 $\pm$ 1.875                   | <b>98.13 <math>\pm</math> 1.875</b> |
| C87 | Aggregative, Moderate | 12 (80) | 68 (80) | 13 (80) | 67 (80) | 15.5 $\pm$ 0.5                      | <b>84.5 <math>\pm</math> 0.5</b>    |
| C88 | Aggregative, Moderate | 2 (80)  | 73 (80) | 2 (80)  | 67 (80) | 2.5 $\pm$ 0                         | <b>87.5 <math>\pm</math> 3.5</b>    |
| C90 | Aggregative, Strong   | 61 (80) | 19 (80) | 54 (80) | 26 (80) | <b>71.75 <math>\pm</math> 4.25</b>  | 28.25 $\pm$ 4.25                    |



|            |                       |         |         |         |         |                      |                     |
|------------|-----------------------|---------|---------|---------|---------|----------------------|---------------------|
| C93        | Aggregative, Strong   | 79 (80) | 1 (80)  | 76 (80) | 4 (80)  | <b>96.88 ± 1.875</b> | 3.125 ± 1.875       |
| C94        | Aggregative, Moderate | 44 (80) | 36 (80) | 33 (80) | 47 (80) | 48 ± 7               | <b>52 ± 7</b>       |
| C96        | Aggregative, Moderate | 2 (80)  | 78 (80) | 0 (80)  | 80 (80) | 1.25 ± 1.25          | <b>98.75 ± 1.25</b> |
| C98        | Aggregative, Strong   | 53 (80) | 27 (80) | 44 (80) | 36 (80) | <b>60.5 ± 5.5</b>    | 39.5 ± 5.5          |
| C99        | Aggregative, Strong   | 49 (80) | 31 (80) | 57 (80) | 23 (80) | <b>66 ± 5</b>        | 34 ± 5              |
| C101       | Aggregative, Strong   | 44 (80) | 36 (80) | 42 (80) | 38 (80) | <b>54 ± 1</b>        | 47 ± 1.5            |
| C104       | Aggregative, Strong   | 46 (80) | 34 (80) | 48 (80) | 32 (80) | <b>58.75 ± 1.25</b>  | 41.25 ± 1.25        |
| Controls:  |                       |         |         |         |         |                      |                     |
| JEONG-1266 | Aggregative, Strong   | 65 (80) | 11 (80) | 76 (80) | 4 (80)  | <b>88 ± 7</b>        | 9.5 ± 4.5           |
| Sakai      | Diffuse, Moderate     | 5 (80)  | 66 (80) | 2 (80)  | 70 (80) | 4.5 ± 1.5            | <b>85.5 ± 2.5</b>   |
| EC4115     | Aggregative, Strong   | 63 (80) | 17 (80) | 65 (80) | 15 (80) | <b>80 ± 1</b>        | 20 ± 1              |
| SS17       | Aggregative, Strong   | 67 (80) | 13 (80) | 77 (80) | 3 (80)  | <b>90 ± 6</b>        | 10 ± 6              |
| SS 52      | Aggregative, Strong   | 80 (80) | 0       | 80 (80) | 0       | <b>100 ± 6</b>       | 0                   |
| EDL933     | Aggregative, Moderate | 22 (80) | 58 (80) | 25 (80) | 55 (80) | 29.5 ± 1.5           | <b>70.5 ± 1.5</b>   |

<sup>1</sup> Each trial had one slide per bacterial group. Each slide in turn had 4 technical replicates spotted on it; 20 well-dispersed cells were evaluated per spot.

<sup>2</sup> MOI, multiplicity of infection

<sup>3</sup> Number of bacteria adhering to each cell is shown as a range of >10, and 1-10. Number of cells without bacteria is not shown

<sup>4</sup> Total number of cells evaluated in each trial is shown in parenthesis

<sup>5</sup> Percent means for ranges used to determine “strong, moderate or non-adherent” quantitative adherence are shown in bold.

**Table S6.** Adherence patterns of SS-O157 (n=53) isolates and control O157 (n=6) strains on Hep-2 cells.

| Strains | Bacterial Adherence Pattern | Eukaryotic cells with adherent bacteria, in the ranges shown, for two different trials <sup>1</sup><br>(MOI <sup>2</sup> = 10 <sup>6</sup> bacteria:10 <sup>5</sup> cells) |                     |          |         | Percent Mean +/- standard error of mean, of eukaryotic cells with adherent bacteria in the ranges shown <sup>5</sup> |                   |
|---------|-----------------------------|----------------------------------------------------------------------------------------------------------------------------------------------------------------------------|---------------------|----------|---------|----------------------------------------------------------------------------------------------------------------------|-------------------|
|         |                             | Trial I                                                                                                                                                                    |                     | Trial II |         | >10                                                                                                                  | 1-10              |
|         |                             | >10                                                                                                                                                                        | 1-10 <sup>(3)</sup> | >10      | 1-10    |                                                                                                                      |                   |
| C1      | Diffuse, Moderate           | 0 (80)                                                                                                                                                                     | 40 (80)             | 0 (80)   | 55 (80) | 0                                                                                                                    | <b>59.5 ± 9.5</b> |
| C2      | Non-Adherent                | 2 (80)                                                                                                                                                                     | 21 (80)             | 0 (80)   | 22 (80) | 1.25± 1.25                                                                                                           | 27± 1             |
| C4      | Non-Adherent                | 0 (80)                                                                                                                                                                     | 35 (80)             | 0 (80)   | 32 (80) | 0                                                                                                                    | 42± 2             |
| C5      | Diffuse, Moderate           | 0 (80)                                                                                                                                                                     | 33 (80)             | 3 (80)   | 47 (80) | 1.9 ± 1.9                                                                                                            | <b>50 ± 9</b>     |
| C6      | Diffuse, Moderate           | 0 (80)                                                                                                                                                                     | 53 (80)             | 0 (80)   | 50 (80) | 0                                                                                                                    | <b>65 ± 2</b>     |
| C7      | Diffuse, Moderate           | 0 (80)                                                                                                                                                                     | 38 (80)             | 1 (80)   | 46 (80) | 0.6 ± 0.6                                                                                                            | <b>53 ± 5</b>     |
| C9      | Diffuse, Moderate           | 0 (80)                                                                                                                                                                     | 39 (80)             | 0 (80)   | 42 (80) | 0                                                                                                                    | <b>51 ± 2</b>     |
| C11     | Diffuse, Moderate           | 0 (80)                                                                                                                                                                     | 37 (80)             | 0 (80)   | 54 (80) | 0                                                                                                                    | <b>57 ± 11</b>    |
| C12     | Diffuse, Moderate           | 0 (80)                                                                                                                                                                     | 39 (80)             | 0 (80)   | 51 (80) | 0                                                                                                                    | <b>56.5 ± 7.5</b> |
| C13     | Non-Adherent                | 0 (80)                                                                                                                                                                     | 42 (80)             | 0 (80)   | 53 (80) | 2.5 ± 2.5                                                                                                            | 33.5 ± 0.5        |
| C14     | Diffuse, Moderate           | 7 (80)                                                                                                                                                                     | 38 (80)             | 3 (80)   | 43 (80) | 6.4 ± 2.6                                                                                                            | <b>51 ± 3</b>     |
| C15     | Diffuse, Moderate           | 0 (80)                                                                                                                                                                     | 43 (80)             | 0 (80)   | 55 (80) | 0                                                                                                                    | <b>61.5 ± 7.5</b> |
| C16     | Diffuse, Moderate           | 0 (80)                                                                                                                                                                     | 47 (80)             | 7 (80)   | 41 (80) | 4.5 ± 4.5                                                                                                            | <b>55 ± 4</b>     |
| C17     | Diffuse, Moderate           | 1 (80)                                                                                                                                                                     | 49 (80)             | 4 (80)   | 31 (80) | 3 ± 2                                                                                                                | <b>50 ± 11</b>    |
| C18     | Diffuse, Moderate           | 0 (80)                                                                                                                                                                     | 43 (80)             | 0 (80)   | 39 (80) | 0                                                                                                                    | <b>51.5 ± 2.5</b> |
| C22     | Diffuse, Moderate           | 0 (80)                                                                                                                                                                     | 43 (80)             | 0 (80)   | 37 (80) | 0                                                                                                                    | <b>50 ± 4</b>     |
| C23     | Diffuse, Moderate           | 0 (80)                                                                                                                                                                     | 53 (80)             | 0 (80)   | 38 (80) | 0                                                                                                                    | <b>57 ± 9</b>     |
| C28     | Diffuse, Moderate           | 0 (80)                                                                                                                                                                     | 41 (80)             | 0 (80)   | 44 (80) | 0                                                                                                                    | <b>53 ± 2</b>     |
| C31     | Diffuse, Moderate           | 0 (80)                                                                                                                                                                     | 42 (80)             | 0 (80)   | 39 (80) | 0                                                                                                                    | <b>51 ± 2</b>     |

|     |                   |        |         |         |         |             |                   |
|-----|-------------------|--------|---------|---------|---------|-------------|-------------------|
| C32 | Diffuse, Moderate | 0 (80) | 41 (80) | 0 (80)  | 38 (80) | 0           | <b>49.5 ± 1.5</b> |
| C34 | Diffuse, Moderate | 1 (80) | 40 (80) | 1 (80)  | 40 (80) | 1.25 ± 0    | <b>50 ± 0</b>     |
| C35 | Diffuse, Moderate | 0 (80) | 43 (80) | 0 (80)  | 42 (80) | 0           | <b>53.5 ± 0.5</b> |
| C36 | Diffuse, Moderate | 0 (80) | 43 (80) | 2 (80)  | 56 (80) | 1.25 ± 1.25 | <b>62 ± 8</b>     |
| C38 | Diffuse, Moderate | 0 (80) | 34 (80) | 0 (80)  | 44 (80) | 0           | <b>49 ± 6</b>     |
| C39 | Diffuse, Moderate | 0 (80) | 45 (80) | 0 (80)  | 48 (80) | 0           | <b>58 ± 2</b>     |
| C40 | Diffuse, Moderate | 0 (80) | 47 (80) | 0 (80)  | 49 (80) | 0           | <b>60 ± 1</b>     |
| C42 | Diffuse, Moderate | 0 (80) | 59 (80) | 1 (80)  | 55 (80) | 0.6 ± 0.6   | <b>71.5 ± 2.5</b> |
| C45 | Non-Adherent      | 0 (80) | 30 (80) | 0 (80)  | 35 (80) | 0           | 41 ± 3            |
| C49 | Non-Adherent      | 0 (80) | 29 (80) | 0 (80)  | 36 (80) | 0           | 41 ± 5            |
| C53 | Diffuse, Moderate | 0 (80) | 40 (80) | 0 (80)  | 54 (80) | 0           | <b>59 ± 9</b>     |
| C54 | Diffuse, Moderate | 0 (80) | 31 (80) | 0 (80)  | 49 (80) | 0           | <b>50 ± 11</b>    |
| C57 | Diffuse, Moderate | 0 (80) | 45 (80) | 0 (80)  | 60 (80) | 0           | <b>65.5 ± 9.5</b> |
| C62 | Diffuse, Moderate | 0 (80) | 36 (80) | 0 (80)  | 44 (80) | 0           | <b>50 ± 5</b>     |
| C63 | Diffuse, Moderate | 0 (80) | 42 (80) | 0 (80)  | 38 (80) | 0           | <b>50 ± 3</b>     |
| C66 | Diffuse, Moderate | 0 (80) | 37 (80) | 0 (80)  | 43 (80) | 0           | <b>50 ± 4</b>     |
| C73 | Diffuse, Moderate | 0 (80) | 35 (80) | 0 (80)  | 48 (80) | 0           | <b>52 ± 8</b>     |
| C74 | Diffuse, Moderate | 0 (80) | 35 (80) | 0 (80)  | 45 (80) | 0           | <b>50 ± 6</b>     |
| C76 | Diffuse, Moderate | 0 (80) | 60 (80) | 0 (80)  | 61 (80) | 0           | <b>75.5 ± 0.5</b> |
| C77 | Non-Adherent      | 0 (80) | 22 (80) | 0 (80)  | 26 (80) | 0           | 30.5 ± 2.5        |
| C78 | Diffuse, Moderate | 0 (80) | 31 (80) | 0 (80)  | 49 (80) | 0           | <b>50 ± 11</b>    |
| C80 | Diffuse, Moderate | 0 (80) | 48 (80) | 0 (80)  | 34 (80) | 0           | <b>51.5 ± 8.5</b> |
| C83 | Diffuse, Moderate | 0 (80) | 40 (80) | 2 (80)  | 40 (80) | 1.25 ± 1.25 | <b>50</b>         |
| C85 | Diffuse, Moderate | 3 (80) | 64 (80) | 15 (80) | 57 (80) | 11.4 ± 7.6  | <b>75.5 ± 4.5</b> |
| C87 | Diffuse, Moderate | 4 (80) | 67 (80) | 0 (80)  | 61 (80) | 2.5 ± 2.5   | <b>80 ± 4</b>     |
| C88 | Diffuse, Moderate | 0 (80) | 36 (80) | 0 (80)  | 51 (80) | 0           | <b>54.5 ± 9.5</b> |

|                  |                   |         |         |        |         |            |                   |
|------------------|-------------------|---------|---------|--------|---------|------------|-------------------|
| C90              | Diffuse, Moderate | 0 (80)  | 45 (80) | 0 (80) | 44 (80) | 0          | <b>55.5 ± 0.5</b> |
| C93              | Diffuse, Moderate | 0 (80)  | 31 (80) | 0 (80) | 49 (80) | 0          | <b>50 ± 11</b>    |
| C94              | Diffuse, Moderate | 0 (80)  | 40 (80) | 4 (80) | 50 (80) | 2.5 ± 2.5  | <b>56.5 ± 6.5</b> |
| C96              | Diffuse, Moderate | 0 (80)  | 34 (80) | 0 (80) | 46 (80) | 0          | <b>50.5 ± 7.5</b> |
| C98              | Diffuse, Moderate | 0 (80)  | 51 (80) | 1 (80) | 29 (80) | 0.6 ± 0.6  | <b>50 ± 14</b>    |
| C99              | Diffuse, Moderate | 0 (80)  | 46 (80) | 0 (80) | 58 (80) | 0          | <b>65.5 ± 7.5</b> |
| C101             | Diffuse, Moderate | 0 (80)  | 40 (80) | 0 (80) | 46 (80) | 0          | <b>54 ± 4</b>     |
| C104             | Diffuse, Moderate | 1 (80)  | 48 (80) | 0 (80) | 57 (80) | 0.6 ± 0.6  | <b>65.5 ± 5.5</b> |
| <b>Controls:</b> |                   |         |         |        |         |            |                   |
| JEONG-1266       | Diffuse, Moderate | 0 (80)  | 43 (80) | 0 (80) | 40 (80) | 0          | <b>52 ± 2</b>     |
| Sakai            | Diffuse, Moderate | 0 (80)  | 43 (80) | 0 (80) | 55 (80) | 0          | <b>61.5 ± 7.5</b> |
| EC4115           | Diffuse, Moderate | 0 (80)  | 47 (80) | 0 (80) | 44 (80) | 0          | <b>57 ± 2</b>     |
| SS17             | Diffuse, Moderate | 10 (80) | 69 (80) | 8 (80) | 60 (80) | 11.5 ± 1.5 | <b>84.5 ± 1.5</b> |
| SS 52            | Diffuse, Moderate | 0 (80)  | 50 (80) | 0 (80) | 71 (80) | 0          | <b>76 ± 13</b>    |
| EDL933           | Diffuse, Moderate | 0 (80)  | 40 (80) | 4 (80) | 46 (80) | 2.5 ± 2.5  | <b>54 ± 4</b>     |

<sup>1</sup> Each trial had one slide per

bacterial group. Each slide in turn had 2 chambers (technical replicate) on it; 20 well-dispersed cells in 4 different fields were evaluated per chamber.

<sup>2</sup> MOI, multiplicity of infection

<sup>3</sup> Number of bacteria adhering to each cell is shown as a range of >10, and 1-10. Number of cells without bacteria is not shown

<sup>4</sup> Total number of cells evaluated in each trial is shown in parenthesis

<sup>5</sup> Percent means for ranges used to determine “strong, moderate or non-adherent” quantitative adherence are shown in bold.

**Table S7.** AST profiles of 53 SS-O157 isolates against 17 antibiotics<sup>a, b</sup>

| SS-O157                                                                      | AmC-30 | AM-10 | AZM-15 | CL-10 | GM-10 | NA-30 | PB-300 | S-10 | XNL-30 | CRO-30 | C-30 | G-.25 | TE-30 | FOX-30 | CIP-5 | FOS-200 | SXT-25 | AST profile              |
|------------------------------------------------------------------------------|--------|-------|--------|-------|-------|-------|--------|------|--------|--------|------|-------|-------|--------|-------|---------|--------|--------------------------|
| C-1; C15; C40                                                                | S      | S     | S      | S     | S     | S     | S      | S    | S      | S      | S    | S     | S     | S      | S     | S       | S      | Susceptible to all       |
| C-2; C-6; C-57; C-62; C-73; C-74                                             | S      | S     | I      | S     | S     | S     | S      | I    | S      | S      | S    | I     | S     | S      | S     | S       | S      | AZM; S; G                |
| C-4                                                                          | S      | S     | I      | S     | S     | S     | S      | S    | S      | S      | S    | R     | I     | S      | S     | S       | S      | AZM; G; TE               |
| C-5                                                                          | S      | S     | I      | S     | S     | S     | S      | S    | S      | S      | I    | I     | S     | S      | S     | S       | S      | AZM; C; G                |
| C-7                                                                          | S      | S     | S      | S     | S     | S     | S      | S    | S      | S      | S    | S     | I     | S      | S     | S       | S      | TE                       |
| C-9                                                                          | S      | S     | I      | S     | S     | S     | S      | I    | I      | S      | S    | S     | S     | S      | S     | S       | S      | AZM; S; XNL              |
| C-11                                                                         | S      | S     | I      | S     | S     | S     | S      | S    | I      | S      | I    | R     | S     | S      | S     | S       | S      | AZM; XNL; C; G           |
| C-12                                                                         | S      | S     | I      | S     | S     | S     | S      | S    | I      | S      | I    | R     | I     | S      | S     | S       | S      | AZM; XNL; C; G; TE       |
| C-13                                                                         | S      | S     | I      | S     | S     | S     | S      | S    | S      | S      | S    | I     | S     | S      | S     | S       | S      | AZM; G                   |
| C-14; C-16; C-17; C-93                                                       | S      | S     | I      | S     | S     | S     | S      | I    | S      | S      | I    | I     | S     | S      | S     | S       | S      | AZM; S; C; G             |
| C-18; C-23; C-28; C-31; C-34;<br>C-36; C-39; C-42; C-53; C-54;<br>C-76; C-78 | S      | S     | I      | S     | S     | S     | S      | I    | S      | S      | S    | R     | S     | S      | S     | S       | S      | AZM; S; G                |
| C-19                                                                         | S      | S     | I      | S     | S     | S     | S      | I    | I      | S      | I    | S     | S     | S      | S     | S       | S      | AZM; S; XNL; C           |
| C-22                                                                         | S      | S     | I      | S     | I     | S     | S      | I    | S      | S      | S    | R     | S     | S      | S     | S       | S      | AZM; GM; S; G;           |
| C-32                                                                         | S      | S     | I      | S     | S     | S     | S      | I    | S      | S      | I    | S     | S     | S      | S     | S       | S      | AZM; S; C                |
| C-35; C-77; C-83; C-94                                                       | S      | S     | I      | S     | S     | S     | S      | I    | S      | S      | S    | S     | S     | S      | S     | S       | S      | AZM; S                   |
| C-38; C-101                                                                  | S      | S     | I      | S     | S     | S     | S      | I    | I      | S      | I    | R     | I     | S      | S     | S       | S      | AZM; S; XNL; C; G;<br>TE |
| C-45                                                                         | S      | S     | I      | S     | S     | S     | S      | I    | I      | S      | S    | R     | S     | S      | S     | S       | S      | AZM; S; XNL; G           |
| C-49                                                                         | S      | S     | I      | S     | S     | S     | S      | I    | S      | S      | I    | R     | S     | S      | S     | S       | S      | AZM; S; C; G             |
| C-66                                                                         | S      | S     | I      | S     | S     | I     | S      | S    | I      | S      | I    | R     | S     | S      | S     | S       | S      | AZM; NA; XNL; C; G       |
| C-80                                                                         | S      | S     | S      | S     | S     | S     | S      | S    | S      | S      | S    | R     | S     | S      | S     | S       | S      | G                        |
| C-85                                                                         | S      | S     | I      | S     | S     | S     | S      | S    | I      | S      | S    | R     | S     | S      | S     | S       | S      | AZM; XNL; G              |
| C-87                                                                         | S      | S     | I      | S     | S     | S     | S      | I    | I      | S      | S    | R     | S     | S      | S     | S       | S      | AZM; S; XNL; G           |
| C-88                                                                         | S      | I     | I      | S     | S     | S     | S      | I    | I      | S      | S    | R     | S     | S      | S     | S       | S      | AM; AZM; S; XNL; G       |
| C-90; C-98                                                                   | S      | S     | I      | S     | S     | S     | S      | S    | S      | S      | S    | R     | S     | S      | S     | S       | S      | AZM; G                   |
| C-96                                                                         | S      | S     | I      | S     | S     | S     | S      | S    | S      | S      | I    | R     | S     | S      | S     | S       | S      | AZM; C; G                |
| C-99                                                                         | S      | S     | I      | S     | S     | S     | S      | S    | I      | S      | S    | R     | S     | S      | S     | S       | S      | AZM; XNL; G              |
| C-104                                                                        | S      | S     | S      | S     | S     | S     | S      | I    | S      | S      | S    | R     | R     | S      | S     | S       | S      | S; G; TE                 |

<sup>a</sup> Antibiotic Disc-Concentration (mcg); AmC-30 = Amoxicillin with Clavulanic Acid, 20/10 mcg; AM-10 = Ampicillin; AZM-15 = Azithromycin; FOX-30 = Cefoxitin; XNL-30 = Ceftiofur; CRO-30 = Ceftriaxone; CIP-5 = Ciprofloxacin; CL-10 = Colistin; C-30 = Chloramphenicol; FOS200 = Fosfomycin; GM-10 = Gentamicin; NA-30 = Nalidixic Acid; PB-300 = Polymyxin B; S-10 = Streptomycin; SXT = Sulfamethoxazole with Trimethoprim, 23.75/1.25 mcg; G-.25 = Sulfisoxazole; TE-30 = Tetracycline

<sup>b</sup> S: Susceptible, I: Intermediate susceptibility, R: Resistant

**Table S8.** AST profiles of six control O157 strains against 17 antibiotics <sup>a, b</sup>

| Control<br>O157<br>Strains | AmC-30 | AM-10 | AZM-15 | CL-10 | GM-10 | NA-30 | PB-300 | S-10 | XNL-30 | CRO-30 | C-30 | G-.25 | TE-30 | FOX-30 | CIP-5 | FOS-200 | SXT-25 | AST profile        |
|----------------------------|--------|-------|--------|-------|-------|-------|--------|------|--------|--------|------|-------|-------|--------|-------|---------|--------|--------------------|
| JEONG-1266                 | S      | S     | I      | S     | S     | S     | S      | I    | S      | S      | I    | I     | S     | S      | S     | S       | S      | AZM; S; C; G;      |
| Sakai                      | S      | S     | R      | S     | S     | I     | S      | S    | S      | S      | I    | R     | S     | S      | S     | S       | S      | AZM; NA; C; G;     |
| EC4115                     | S      | S     | I      | S     | S     | S     | S      | S    | S      | S      | I    | S     | I     | I      | S     | S       | S      | AZM; C; TE; FOX    |
| SS17                       | S      | S     | R      | S     | S     | S     | S      | I    | S      | S      | I    | S     | I     | S      | S     | S       | S      | AZM; S; C; TE      |
| SS 52                      | S      | S     | I      | S     | S     | S     | S      | I    | S      | S      | S    | I     | I     | I      | S     | S       | S      | AZM; S; G; TE; FOX |
| EDL933                     | S      | S     | R      | S     | S     | S     | S      | S    | S      | S      | I    | I     | I     | I      | S     | S       | S      | AZM; C; G; TE; FOX |

<sup>a</sup> Antibiotic Disc-Concentration (mcg); AmC-30 = Amoxicillin with Clavulanic Acid, 20/10 mcg; AM-10 = Ampicillin; AZM-15 = Azithromycin; FOX-30 = Cefoxitin; XNL-30 = Ceftiofur; CRO-30 = Ceftriaxone; CIP-5 = Ciprofloxacin; CL-10 = Colistin; C-30 = Chloramphenicol; FOS200 = Fosfomycin; GM-10 = Gentamicin; NA-30 = Nalidixic Acid; PB-300 = Polymyxin B; S-10 = Streptomycin; SXT = Sulfamethoxazole with Trimethoprim, 23.75/1.25 mcg; G-.25 = Sulfisoxazole; TE-30 = Tetracycline

<sup>b</sup> S: Susceptible, I: Intermediate susceptibility, R: Resistant

**Table S9.** AST profiles of 20 bovine *E. coli* isolates against 17 antibiotics <sup>a, b</sup>

| <i>E. coli</i> isolates    | AmC-30 | AM-10 | AZM-15 | CL-10 | GM-10 | NA-30 | PB-300 | S-10 | XNL-30 | CRO-30 | C-30 | G-.25 | TE-30 | FOX-30 | CIP-5 | FOS-200 | SXT-25 | AST profile               |
|----------------------------|--------|-------|--------|-------|-------|-------|--------|------|--------|--------|------|-------|-------|--------|-------|---------|--------|---------------------------|
| 870-1; 887-1; 887-2; 887-3 | S      | S     | I      | S     | S     | S     | S      | I    | S      | S      | S    | S     | I     | S      | S     | S       | S      | AZM; S; TE                |
| 870-2; 870-3               | I      | I     | I      | S     | S     | S     | S      | R    | S      | S      | R    | R     | R     | S      | S     | S       | S      | AMC; AM; AZM; S; C; G; TE |
| 870-4                      | S      | S     | I      | S     | R     | S     | S      | I    | S      | S      | S    | S     | I     | S      | S     | S       | S      | AZM; GM; S; TE            |
| 887-4                      | S      | S     | I      | S     | S     | S     | S      | I    | S      | S      | R    | S     | I     | S      | S     | S       | S      | AZM; S; C; TE             |
| 888-1                      | S      | S     | I      | S     | S     | S     | S      | S    | S      | S      | S    | S     | R     | S      | S     | S       | S      | AZM; G                    |
| 888-2                      | I      | S     | S      | S     | S     | S     | S      | I    | S      | S      | S    | R     | S     | S      | S     | S       | S      | AMC; S; G                 |
| 888-3                      | S      | S     | I      | S     | S     | S     | S      | S    | S      | S      | S    | S     | I     | S      | S     | S       | S      | AZM; TE                   |
| 888-4                      | S      | S     | I      | S     | S     | S     | S      | I    | S      | S      | S    | R     | S     | S      | S     | S       | S      | AZM; S; G                 |
| 912-1                      | S      | S     | I      | S     | S     | I     | S      | I    | S      | S      | S    | R     | S     | S      | S     | S       | S      | AZM; NA; S; G             |
| 912-2; 912-3               | S      | S     | I      | S     | S     | S     | S      | I    | S      | S      | S    | R     | R     | S      | S     | S       | S      | AZM; S; G; TE             |
| 912-4                      | S      | S     | R      | S     | S     | I     | S      | R    | S      | S      | S    | R     | R     | S      | S     | S       | S      | AZM; NA; S; G; TE         |
| 914-1                      | S      | S     | I      | S     | S     | S     | S      | I    | S      | S      | S    | S     | I     | I      | S     | S       | S      | AZM; S; TE; FOX           |
| 914-2                      | S      | I     | I      | S     | S     | S     | S      | I    | S      | S      | S    | S     | S     | S      | S     | S       | S      | AM; AZM; S                |
| 914-3                      | I      | I     | I      | S     | S     | S     | S      | I    | S      | S      | S    | I     | S     | S      | S     | S       | S      | AMC; AM; AZM; S; G        |
| 914-4                      | I      | I     | I      | S     | S     | S     | S      | I    | S      | S      | S    | S     | S     | S      | S     | S       | S      | AMC; AM; AZM; S           |

<sup>a</sup> Antibiotic Disc-Concentration (mcg); AmC-30 = Amoxicillin with Clavulanic Acid, 20/10 mcg; AM-10 = Ampicillin; AZM-15 = Azithromycin; FOX-30 = Cefoxitin; XNL-30 = Ceftiofur; CRO-30 = Ceftriaxone; CIP-5 = Ciprofloxacin; CL-10 = Colistin; C-30 = Chloramphenicol; FOS200 = Fosfomycin; GM-10 = Gentamicin; NA-30 = Nalidixic Acid; PB-300 = Polymyxin B; S-10 = Streptomycin; SXT = Sulfamethoxazole with Trimethoprim, 23.75/1.25 mcg; G-.25 = Sulfisoxazole; TE-30 = Tetracycline

<sup>b</sup> S: Susceptible, I: Intermediate susceptibility, R: Resistant

**Table S10.** AR and integrase gene profiles of SS-O157 (n=53) isolates <sup>a, b</sup>

| Antibiotic resistance and toxin genes tested among SS O157 strains |                   |              |             |            |             |              |                             |               |              |             |            |            |             |             |             |             |             |             |                |             |             |             |             |             |             |             |             |                           |             |             |             |            |             |             |  |
|--------------------------------------------------------------------|-------------------|--------------|-------------|------------|-------------|--------------|-----------------------------|---------------|--------------|-------------|------------|------------|-------------|-------------|-------------|-------------|-------------|-------------|----------------|-------------|-------------|-------------|-------------|-------------|-------------|-------------|-------------|---------------------------|-------------|-------------|-------------|------------|-------------|-------------|--|
| SS-<br>O157                                                        | <i>aac</i> (3)-IV | <i>aadA1</i> | <i>acrB</i> | <i>ais</i> | <i>arnA</i> | <i>catA1</i> | <i>bla</i> <sub>CTX-M</sub> | <i>dfx-A1</i> | <i>dhfrI</i> | <i>emrA</i> | <i>fsr</i> | <i>int</i> | <i>macA</i> | <i>marA</i> | <i>mcr1</i> | <i>mcr2</i> | <i>mdtH</i> | <i>mdtO</i> | <i>mph</i> (A) | <i>pmrD</i> | <i>qnrA</i> | <i>rarD</i> | <i>stx1</i> | <i>stx2</i> | <i>sul1</i> | <i>sul2</i> | <i>sul3</i> | <i>bla</i> <sub>TEM</sub> | <i>tetA</i> | <i>tetB</i> | <i>tetC</i> | <i>ybh</i> | <i>yjcP</i> | <i>yjcR</i> |  |
| C-1                                                                | 0                 | 0            | 1           | 1          | 1           | 0            | 0                           | 0             | 0            | 1           | 1          | 1          | 1           | 0           | 0           | 0           | 1           | 0           | 0              | 1           | 0           | 1           | 0           | 1           | 0           | 0           | 0           | 0                         | 0           | 0           | 0           | 1          | 1           | 1           |  |
| C-2                                                                | 0                 | 0            | 1           | 1          | 1           | 0            | 0                           | 0             | 0            | 1           | 1          | 1          | 1           | 1           | 0           | 0           | 1           | 1           | 0              | 1           | 0           | 1           | 0           | 1           | 0           | 0           | 0           | 0                         | 0           | 0           | 0           | 1          | 1           | 1           |  |
| C-4                                                                | 0                 | 0            | 1           | 1          | 1           | 0            | 0                           | 0             | 0            | 1           | 1          | 1          | 1           | 1           | 0           | 0           | 1           | 1           | 0              | 1           | 0           | 1           | 1           | 1           | 0           | 0           | 0           | 0                         | 0           | 0           | 0           | 1          | 1           | 1           |  |
| C-5                                                                | 0                 | 0            | 1           | 1          | 1           | 0            | 0                           | 0             | 0            | 1           | 1          | 1          | 1           | 1           | 0           | 0           | 1           | 1           | 0              | 1           | 0           | 1           | 0           | 1           | 0           | 1           | 0           | 0                         | 0           | 0           | 0           | 1          | 1           | 1           |  |
| C-6                                                                | 0                 | 0            | 1           | 1          | 1           | 0            | 0                           | 0             | 0            | 1           | 1          | 1          | 1           | 1           | 0           | 0           | 1           | 1           | 0              | 1           | 0           | 1           | 0           | 1           | 0           | 0           | 0           | 0                         | 0           | 0           | 0           | 1          | 1           | 1           |  |
| C-7                                                                | 1                 | 0            | 1           | 1          | 1           | 0            | 0                           | 0             | 0            | 1           | 1          | 1          | 1           | 1           | 0           | 0           | 1           | 1           | 0              | 1           | 0           | 1           | 0           | 1           | 0           | 0           | 0           | 0                         | 0           | 0           | 0           | 1          | 1           | 1           |  |
| C-9                                                                | 0                 | 0            | 1           | 1          | 1           | 0            | 0                           | 0             | 0            | 1           | 1          | 1          | 1           | 1           | 0           | 0           | 1           | 1           | 0              | 1           | 0           | 1           | 1           | 0           | 0           | 0           | 0           | 0                         | 0           | 0           | 0           | 1          | 1           | 1           |  |
| C-11                                                               | 0                 | 0            | 1           | 1          | 1           | 0            | 0                           | 0             | 0            | 1           | 1          | 1          | 1           | 1           | 0           | 0           | 1           | 1           | 0              | 1           | 0           | 1           | 1           | 1           | 0           | 0           | 0           | 0                         | 0           | 0           | 0           | 1          | 1           | 1           |  |
| C-12                                                               | 0                 | 0            | 1           | 1          | 1           | 0            | 0                           | 0             | 0            | 1           | 1          | 1          | 1           | 1           | 0           | 0           | 1           | 1           | 0              | 1           | 0           | 1           | 1           | 1           | 0           | 0           | 0           | 0                         | 0           | 0           | 0           | 1          | 1           | 1           |  |
| C-13                                                               | 0                 | 0            | 1           | 1          | 1           | 0            | 0                           | 0             | 0            | 1           | 1          | 1          | 1           | 1           | 0           | 0           | 1           | 1           | 0              | 1           | 0           | 1           | 1           | 1           | 0           | 0           | 0           | 0                         | 0           | 0           | 0           | 1          | 1           | 1           |  |
| C-14                                                               | 0                 | 0            | 1           | 1          | 1           | 0            | 0                           | 0             | 0            | 0           | 0          | 0          | 1           | 1           | 0           | 0           | 1           | 1           | 0              | 0           | 0           | 0           | 0           | 1           | 0           | 0           | 0           | 0                         | 0           | 0           | 0           | 1          | 1           | 1           |  |
| C-15                                                               | 0                 | 0            | 1           | 1          | 1           | 0            | 0                           | 0             | 0            | 1           | 1          | 1          | 1           | 1           | 0           | 0           | 1           | 1           | 0              | 1           | 0           | 1           | 0           | 1           | 0           | 0           | 0           | 0                         | 0           | 0           | 0           | 1          | 1           | 1           |  |
| C-16                                                               | 0                 | 0            | 1           | 1          | 1           | 0            | 0                           | 0             | 0            | 0           | 0          | 0          | 1           | 1           | 0           | 0           | 1           | 1           | 0              | 0           | 0           | 0           | 0           | 1           | 0           | 0           | 0           | 0                         | 0           | 0           | 0           | 1          | 1           | 1           |  |
| C-17                                                               | 0                 | 0            | 1           | 1          | 1           | 0            | 0                           | 0             | 0            | 1           | 1          | 1          | 1           | 1           | 0           | 0           | 1           | 1           | 0              | 1           | 0           | 1           | 1           | 1           | 0           | 0           | 0           | 0                         | 0           | 0           | 0           | 1          | 1           | 1           |  |
| C-18                                                               | 0                 | 0            | 1           | 1          | 1           | 0            | 0                           | 0             | 0            | 1           | 1          | 1          | 1           | 1           | 0           | 0           | 1           | 1           | 0              | 1           | 0           | 1           | 1           | 1           | 0           | 0           | 0           | 0                         | 0           | 0           | 0           | 1          | 1           | 1           |  |
| C-19                                                               | 0                 | 0            | 1           | 1          | 1           | 0            | 0                           | 0             | 0            | 1           | 1          | 1          | 1           | 1           | 0           | 0           | 1           | 1           | 0              | 1           | 0           | 1           | 1           | 1           | 0           | 0           | 0           | 0                         | 0           | 0           | 0           | 1          | 1           | 1           |  |
| C-22                                                               | 0                 | 0            | 1           | 1          | 1           | 0            | 0                           | 0             | 0            | 1           | 1          | 1          | 1           | 1           | 0           | 0           | 1           | 1           | 0              | 1           | 0           | 1           | 0           | 1           | 0           | 0           | 0           | 0                         | 0           | 0           | 0           | 1          | 1           | 1           |  |
| C-23                                                               | 0                 | 0            | 1           | 1          | 1           | 0            | 0                           | 0             | 0            | 0           | 0          | 0          | 1           | 1           | 0           | 0           | 1           | 1           | 0              | 1           | 0           | 1           | 1           | 1           | 0           | 0           | 0           | 0                         | 0           | 0           | 0           | 1          | 1           | 1           |  |
| C-28                                                               | 0                 | 0            | 1           | 1          | 1           | 0            | 0                           | 0             | 0            | 1           | 1          | 1          | 1           | 1           | 0           | 0           | 1           | 1           | 0              | 1           | 0           | 1           | 0           | 1           | 0           | 0           | 0           | 0                         | 0           | 0           | 0           | 1          | 1           | 1           |  |
| C-31                                                               | 0                 | 0            | 1           | 1          | 1           | 0            | 0                           | 0             | 0            | 1           | 1          | 1          | 1           | 1           | 0           | 0           | 1           | 1           | 0              | 1           | 0           | 1           | 0           | 1           | 0           | 0           | 0           | 0                         | 0           | 0           | 0           | 1          | 1           | 1           |  |
| C-32                                                               | 0                 | 0            | 1           | 1          | 1           | 0            | 0                           | 0             | 0            | 1           | 1          | 1          | 1           | 1           | 0           | 0           | 1           | 1           | 0              | 1           | 0           | 1           | 1           | 1           | 0           | 0           | 0           | 0                         | 0           | 0           | 0           | 1          | 1           | 1           |  |
| C-34                                                               | 0                 | 0            | 1           | 1          | 1           | 0            | 0                           | 0             | 0            | 1           | 1          | 1          | 1           | 1           | 0           | 0           | 1           | 1           | 0              | 1           | 0           | 1           | 0           | 1           | 0           | 0           | 0           | 0                         | 0           | 0           | 0           | 1          | 1           | 1           |  |
| C-35                                                               | 0                 | 0            | 1           | 1          | 1           | 0            | 0                           | 0             | 0            | 1           | 1          | 1          | 1           | 1           | 0           | 0           | 1           | 1           | 0              | 1           | 0           | 1           | 1           | 1           | 0           | 0           | 0           | 0                         | 0           | 0           | 0           | 1          | 1           | 1           |  |
| C-36                                                               | 0                 | 0            | 1           | 1          | 1           | 0            | 0                           | 0             | 0            | 1           | 1          | 1          | 1           | 1           | 0           | 0           | 1           | 1           | 0              | 1           | 0           | 1           | 1           | 1           | 0           | 0           | 0           | 0                         | 0           | 0           | 0           | 1          | 1           | 1           |  |
| C-38                                                               | 0                 | 0            | 1           | 1          | 1           | 0            | 0                           | 0             | 0            | 1           | 1          | 1          | 1           | 1           | 0           | 0           | 1           | 1           | 0              | 1           | 0           | 1           | 0           | 1           | 0           | 0           | 0           | 0                         | 0           | 0           | 0           | 1          | 1           | 1           |  |



|       |   |   |   |   |   |   |   |   |   |   |   |   |   |   |   |   |   |   |   |   |   |   |   |   |   |   |   |   |   |   |   |
|-------|---|---|---|---|---|---|---|---|---|---|---|---|---|---|---|---|---|---|---|---|---|---|---|---|---|---|---|---|---|---|---|
| C-39  | 0 | 0 | 1 | 1 | 1 | 0 | 0 | 0 | 0 | 1 | 1 | 1 | 1 | 1 | 0 | 0 | 1 | 1 | 0 | 1 | 0 | 1 | 0 | 0 | 0 | 0 | 0 | 0 | 1 | 1 | 1 |
| C-40  | 0 | 0 | 1 | 1 | 1 | 0 | 0 | 0 | 0 | 1 | 1 | 1 | 1 | 1 | 0 | 0 | 1 | 1 | 0 | 1 | 0 | 1 | 1 | 1 | 0 | 0 | 0 | 0 | 1 | 1 | 1 |
| C-42  | 0 | 0 | 1 | 1 | 1 | 0 | 0 | 0 | 0 | 1 | 1 | 1 | 1 | 1 | 0 | 0 | 1 | 1 | 0 | 1 | 0 | 1 | 0 | 1 | 0 | 0 | 0 | 0 | 1 | 1 | 1 |
| C-45  | 0 | 0 | 1 | 1 | 1 | 0 | 0 | 0 | 0 | 1 | 1 | 1 | 1 | 1 | 0 | 0 | 1 | 0 | 0 | 1 | 0 | 1 | 0 | 1 | 0 | 0 | 0 | 0 | 1 | 1 | 1 |
| C-49  | 0 | 0 | 1 | 1 | 1 | 0 | 0 | 0 | 0 | 0 | 0 | 0 | 1 | 1 | 0 | 0 | 1 | 1 | 0 | 1 | 0 | 1 | 0 | 1 | 0 | 0 | 0 | 0 | 1 | 1 | 1 |
| C-53  | 0 | 0 | 1 | 1 | 1 | 0 | 0 | 0 | 0 | 1 | 1 | 1 | 1 | 1 | 0 | 0 | 1 | 1 | 0 | 1 | 0 | 1 | 0 | 1 | 0 | 0 | 0 | 0 | 1 | 1 | 1 |
| C-54  | 0 | 0 | 1 | 1 | 1 | 0 | 0 | 0 | 0 | 1 | 1 | 1 | 1 | 1 | 0 | 0 | 1 | 1 | 0 | 1 | 0 | 1 | 0 | 1 | 0 | 0 | 0 | 0 | 1 | 1 | 1 |
| C-57  | 0 | 0 | 1 | 1 | 1 | 0 | 0 | 0 | 0 | 1 | 1 | 1 | 1 | 1 | 0 | 0 | 1 | 1 | 0 | 1 | 0 | 1 | 1 | 1 | 0 | 0 | 0 | 0 | 1 | 1 | 1 |
| C-62  | 0 | 0 | 1 | 1 | 1 | 0 | 0 | 0 | 0 | 1 | 1 | 1 | 1 | 1 | 0 | 0 | 1 | 1 | 0 | 1 | 0 | 1 | 0 | 1 | 0 | 0 | 0 | 0 | 1 | 1 | 1 |
| C-66  | 0 | 0 | 1 | 1 | 1 | 0 | 0 | 0 | 0 | 1 | 1 | 1 | 1 | 1 | 0 | 0 | 1 | 1 | 0 | 1 | 0 | 1 | 1 | 1 | 0 | 0 | 0 | 0 | 1 | 1 | 1 |
| C-73  | 0 | 0 | 1 | 1 | 1 | 0 | 0 | 0 | 0 | 1 | 1 | 1 | 1 | 1 | 0 | 0 | 1 | 1 | 0 | 1 | 0 | 1 | 0 | 1 | 0 | 0 | 0 | 0 | 1 | 1 | 1 |
| C-74  | 0 | 0 | 1 | 1 | 1 | 0 | 0 | 0 | 0 | 1 | 1 | 1 | 1 | 1 | 0 | 0 | 1 | 1 | 0 | 1 | 0 | 1 | 0 | 1 | 0 | 0 | 0 | 0 | 1 | 1 | 1 |
| C-76  | 0 | 0 | 1 | 1 | 1 | 0 | 0 | 0 | 0 | 1 | 1 | 1 | 1 | 1 | 0 | 0 | 1 | 1 | 0 | 1 | 0 | 1 | 0 | 1 | 0 | 0 | 0 | 0 | 1 | 1 | 1 |
| C-77  | 0 | 0 | 1 | 1 | 1 | 0 | 0 | 0 | 0 | 1 | 1 | 1 | 1 | 1 | 0 | 0 | 1 | 1 | 0 | 1 | 0 | 1 | 0 | 1 | 0 | 0 | 0 | 0 | 1 | 1 | 1 |
| C-78  | 0 | 0 | 1 | 1 | 1 | 0 | 0 | 0 | 0 | 1 | 1 | 1 | 1 | 1 | 0 | 0 | 1 | 1 | 0 | 1 | 0 | 1 | 0 | 1 | 0 | 0 | 0 | 0 | 1 | 1 | 1 |
| C-80  | 0 | 0 | 1 | 1 | 1 | 0 | 0 | 0 | 0 | 1 | 1 | 1 | 1 | 1 | 0 | 0 | 1 | 1 | 0 | 1 | 0 | 1 | 1 | 1 | 0 | 0 | 0 | 0 | 1 | 1 | 1 |
| C-83  | 0 | 0 | 1 | 1 | 1 | 0 | 0 | 0 | 0 | 1 | 1 | 1 | 1 | 1 | 0 | 0 | 1 | 1 | 0 | 1 | 0 | 1 | 1 | 1 | 0 | 0 | 0 | 0 | 1 | 1 | 1 |
| C-85  | 0 | 0 | 1 | 1 | 1 | 0 | 0 | 0 | 0 | 1 | 1 | 1 | 1 | 1 | 0 | 0 | 1 | 1 | 0 | 1 | 0 | 1 | 0 | 1 | 0 | 0 | 0 | 0 | 1 | 1 | 1 |
| C-87  | 0 | 0 | 1 | 1 | 1 | 0 | 0 | 0 | 0 | 1 | 1 | 1 | 1 | 1 | 0 | 0 | 1 | 1 | 0 | 1 | 0 | 1 | 1 | 1 | 0 | 0 | 0 | 0 | 1 | 1 | 1 |
| C-88  | 0 | 0 | 1 | 1 | 1 | 0 | 0 | 0 | 0 | 1 | 1 | 1 | 1 | 1 | 0 | 0 | 1 | 1 | 0 | 1 | 0 | 1 | 0 | 1 | 0 | 0 | 0 | 0 | 1 | 1 | 1 |
| C-90  | 1 | 0 | 1 | 1 | 1 | 0 | 0 | 0 | 0 | 1 | 1 | 1 | 1 | 1 | 0 | 0 | 1 | 1 | 0 | 1 | 0 | 1 | 1 | 1 | 0 | 0 | 0 | 0 | 1 | 1 | 1 |
| C-93  | 0 | 0 | 1 | 1 | 1 | 0 | 0 | 0 | 0 | 1 | 1 | 1 | 1 | 1 | 0 | 0 | 1 | 1 | 0 | 1 | 0 | 1 | 1 | 1 | 0 | 0 | 0 | 0 | 1 | 1 | 1 |
| C-94  | 0 | 0 | 1 | 1 | 1 | 0 | 0 | 0 | 0 | 1 | 1 | 1 | 1 | 1 | 0 | 0 | 1 | 1 | 0 | 1 | 0 | 1 | 1 | 1 | 0 | 0 | 0 | 0 | 1 | 1 | 1 |
| C-96  | 0 | 0 | 1 | 1 | 1 | 0 | 0 | 0 | 0 | 1 | 1 | 1 | 1 | 1 | 0 | 0 | 1 | 1 | 0 | 1 | 0 | 1 | 1 | 1 | 0 | 0 | 0 | 0 | 1 | 1 | 1 |
| C-98  | 0 | 0 | 1 | 1 | 1 | 0 | 0 | 0 | 0 | 1 | 1 | 1 | 1 | 1 | 0 | 0 | 1 | 1 | 0 | 1 | 0 | 1 | 1 | 1 | 0 | 0 | 0 | 0 | 1 | 1 | 1 |
| C-99  | 0 | 0 | 1 | 1 | 1 | 0 | 0 | 0 | 0 | 1 | 1 | 0 | 1 | 1 | 0 | 0 | 1 | 1 | 0 | 1 | 0 | 1 | 1 | 1 | 0 | 1 | 0 | 0 | 1 | 1 | 1 |
| C-101 | 0 | 0 | 1 | 1 | 1 | 0 | 0 | 0 | 0 | 1 | 1 | 1 | 1 | 1 | 0 | 0 | 1 | 1 | 0 | 1 | 0 | 1 | 1 | 1 | 0 | 0 | 0 | 0 | 1 | 1 | 1 |
| C-104 | 0 | 0 | 1 | 1 | 1 | 0 | 0 | 0 | 0 | 1 | 1 | 1 | 1 | 1 | 0 | 0 | 1 | 1 | 0 | 1 | 0 | 1 | 1 | 1 | 0 | 1 | 0 | 0 | 1 | 1 | 1 |

<sup>a</sup> 0, no amplicon; 1, amplicon present (See Table S7 for details on genes amplified)

<sup>b</sup> All isolates were Positive for following AR genes: *acrB*, *ais*, *arnA*, *macA*, *mdtH*, *yfbH*, *yjcP*, *yjcR*.

All isolates were Negative for following AR genes: *aadA1*, *catA1*, *bla<sub>CTXM</sub>*, *dfrA1*, *dhfr1*, *mcr1*, *mcr2*, *mph(A)*, *qnrA*, *sul1*, *sul3*, *bla<sub>TEM</sub>*, *tetA*, *tetC*

**Table S11.** AR and integrase gene profiles of control O157 (n=6) strains <sup>a, b</sup>

Antibiotic resistance and virulence genes tested among control O157 strains

| Control<br>O157 | <i>aac(3)-IV</i> | <i>aadA1</i> | <i>acrB</i> | <i>ais</i> | <i>arnA</i> | <i>catA1</i> | <i>bla<sub>CTXM</sub></i> | <i>dfrA1</i> | <i>dhfrI</i> | <i>emrA</i> | <i>fsr</i> | <i>Int</i> | <i>macA</i> | <i>marA</i> | <i>mcr1</i> | <i>mcr2</i> | <i>mdtH</i> | <i>mdtO</i> | <i>mph(A)</i> | <i>pmrD</i> | <i>qnrA</i> | <i>rarD</i> | <i>stx1</i> | <i>stx2</i> | <i>sul1</i> | <i>sul2</i> | <i>sul3</i> | <i>bla<sub>TEM</sub></i> | <i>tetA</i> | <i>tetB</i> | <i>tetC</i> | <i>yfbH</i> | <i>yjcP</i> | <i>yjcR</i> |
|-----------------|------------------|--------------|-------------|------------|-------------|--------------|---------------------------|--------------|--------------|-------------|------------|------------|-------------|-------------|-------------|-------------|-------------|-------------|---------------|-------------|-------------|-------------|-------------|-------------|-------------|-------------|-------------|--------------------------|-------------|-------------|-------------|-------------|-------------|-------------|
| JEONG-1266      | 0                | 0            | 1           | 1          | 1           | 0            | 0                         | 0            | 0            | 1           | 1          | 1          | 1           | 1           | 0           | 0           | 1           | 1           | 0             | 1           | 0           | 1           | 0           | 1           | 0           | 1           | 0           | 0                        | 0           | 0           | 0           | 1           | 1           | 1           |
| Sakai           | 0                | 0            | 1           | 1          | 1           | 0            | 0                         | 0            | 0            | 1           | 1          | 1          | 1           | 1           | 0           | 0           | 1           | 1           | 0             | 1           | 0           | 1           | 1           | 1           | 0           | 1           | 0           | 0                        | 0           | 0           | 0           | 1           | 1           | 1           |
| EC4115          | 0                | 0            | 1           | 1          | 1           | 0            | 0                         | 0            | 0            | 1           | 1          | 1          | 1           | 1           | 0           | 0           | 1           | 1           | 0             | 1           | 0           | 1           | 0           | 1           | 0           | 0           | 0           | 0                        | 0           | 0           | 0           | 1           | 1           | 1           |
| SS 17           | 0                | 0            | 1           | 1          | 1           | 0            | 0                         | 0            | 0            | 1           | 1          | 1          | 1           | 1           | 0           | 0           | 1           | 1           | 0             | 1           | 0           | 1           | 0           | 1           | 0           | 0           | 0           | 0                        | 0           | 0           | 0           | 1           | 1           | 1           |
| SS 52           | 0                | 0            | 1           | 1          | 1           | 0            | 0                         | 0            | 0            | 1           | 1          | 1          | 1           | 1           | 0           | 0           | 1           | 1           | 0             | 1           | 0           | 1           | 0           | 1           | 0           | 1           | 0           | 0                        | 0           | 0           | 0           | 1           | 1           | 1           |
| EDL 933         | 0                | 0            | 1           | 1          | 1           | 0            | 0                         | 0            | 0            | 1           | 1          | 1          | 1           | 1           | 0           | 0           | 1           | 1           | 0             | 1           | 0           | 1           | 1           | 1           | 0           | 1           | 0           | 0                        | 0           | 0           | 0           | 1           | 1           | 1           |

<sup>a</sup> 0, no amplicon; 1, amplicon present (See Table S7 for details on genes amplified)<sup>b</sup> All isolates were Positive for following AR genes: *acrB*, *ais*, *arnA*, *emrA*, *fsr*, *Int*, *macA*, *marA*, *mdtH*, *mdtO*, *pmrD*, *rarD*, *stx2*, *yfbH*, *yjcP*, *yjcR*All isolates were Negative for following AR genes: *aac(3)-IV*, *aadA1*, *catA1*, *bla<sub>CTXM</sub>*, *dfrA1*, *dhfrI*, *mcr1*, *mcr2*, *mph(A)*, *qnrA*, *sul1*, *sul3*, *bla<sub>TEM</sub>*, *tetA*, *tetB*, *tetC*

**Table S12.** AR and integrase gene profiles of 20 bovine *E. coli* isolates<sup>a, b</sup>Antibiotic resistance and virulence genes tested among generic *E. coli* isolates

| <i>Bovine<br/>E. coli</i> | <i>aac</i> (3)-IV | <i>aadA1</i> | <i>acrB</i> | <i>ais</i> | <i>arnA</i> | <i>catA1</i> | <i>bla<sub>CTXM</sub></i> | <i>dfrA</i> | <i>dhfrI</i> | <i>emrA</i> | <i>fsr</i> | <i>Int</i> | <i>macA</i> | <i>marA</i> | <i>mcr1</i> | <i>mcr2</i> | <i>mdtH</i> | <i>mdtO</i> | <i>mph(A)</i> | <i>pmrD</i> | <i>qnrA</i> | <i>rarD</i> | <i>stx1</i> | <i>stx2</i> | <i>sul1</i> | <i>sul2</i> | <i>sul3</i> | <i>bla<sub>TEM</sub></i> | <i>tetA</i> | <i>tetB</i> | <i>tetC</i> | <i>yfbH</i> | <i>yjcP</i> | <i>yjcR</i> |   |   |
|---------------------------|-------------------|--------------|-------------|------------|-------------|--------------|---------------------------|-------------|--------------|-------------|------------|------------|-------------|-------------|-------------|-------------|-------------|-------------|---------------|-------------|-------------|-------------|-------------|-------------|-------------|-------------|-------------|--------------------------|-------------|-------------|-------------|-------------|-------------|-------------|---|---|
| 870-1                     | 0                 | 0            | 1           | 1          | 1           | 0            | 0                         | 0           | 0            | 1           | 1          | 0          | 1           | 1           | 0           | 0           | 1           | 1           | 0             | 1           | 0           | 1           | 0           | 0           | 0           | 0           | 0           | 0                        | 0           | 0           | 0           | 1           | 1           | 1           | 1 |   |
| 870-2                     | 0                 | 0            | 1           | 1          | 1           | 0            | 0                         | 0           | 0            | 1           | 1          | 0          | 1           | 1           | 0           | 0           | 1           | 1           | 0             | 1           | 0           | 1           | 0           | 0           | 0           | 1           | 0           | 0                        | 1           | 0           | 0           | 1           | 1           | 1           | 1 |   |
| 870-3                     | 0                 | 0            | 1           | 1          | 1           | 0            | 0                         | 0           | 0            | 1           | 1          | 0          | 1           | 1           | 0           | 0           | 1           | 1           | 0             | 1           | 0           | 1           | 0           | 0           | 0           | 1           | 0           | 0                        | 1           | 0           | 0           | 1           | 1           | 1           | 1 |   |
| 870-4                     | 0                 | 0            | 1           | 1          | 1           | 0            | 0                         | 0           | 0            | 1           | 1          | 0          | 1           | 1           | 0           | 0           | 1           | 1           | 0             | 1           | 0           | 1           | 0           | 0           | 0           | 0           | 0           | 0                        | 0           | 1           | 0           | 1           | 1           | 1           | 1 |   |
| 887-1                     | 0                 | 0            | 1           | 1          | 1           | 0            | 0                         | 0           | 0            | 1           | 1          | 1          | 1           | 1           | 0           | 0           | 1           | 1           | 0             | 1           | 0           | 1           | 0           | 1           | 0           | 0           | 0           | 0                        | 0           | 0           | 0           | 0           | 0           | 1           | 1 | 1 |
| 887-2                     | 0                 | 0            | 1           | 1          | 1           | 0            | 0                         | 0           | 0            | 1           | 1          | 1          | 1           | 1           | 0           | 0           | 1           | 1           | 0             | 1           | 0           | 1           | 0           | 1           | 0           | 0           | 0           | 0                        | 0           | 0           | 0           | 0           | 0           | 1           | 1 | 1 |
| 887-3                     | 0                 | 0            | 1           | 1          | 1           | 0            | 0                         | 0           | 0            | 1           | 1          | 1          | 1           | 1           | 0           | 0           | 1           | 1           | 0             | 1           | 0           | 1           | 0           | 1           | 0           | 0           | 0           | 0                        | 0           | 0           | 0           | 0           | 0           | 1           | 1 | 1 |
| 887-4                     | 0                 | 0            | 1           | 1          | 1           | 0            | 0                         | 0           | 0            | 1           | 1          | 1          | 1           | 1           | 0           | 0           | 1           | 1           | 0             | 1           | 0           | 1           | 0           | 1           | 0           | 0           | 0           | 0                        | 0           | 0           | 0           | 0           | 0           | 1           | 1 | 1 |
| 888-1                     | 0                 | 0            | 1           | 1          | 1           | 0            | 0                         | 0           | 0            | 1           | 1          | 0          | 1           | 0           | 0           | 0           | 1           | 1           | 0             | 1           | 0           | 1           | 0           | 0           | 0           | 0           | 0           | 0                        | 0           | 1           | 0           | 1           | 1           | 1           | 1 |   |
| 888-2                     | 0                 | 0            | 1           | 1          | 1           | 0            | 0                         | 0           | 0            | 1           | 1          | 1          | 1           | 1           | 0           | 0           | 1           | 1           | 0             | 1           | 0           | 1           | 0           | 0           | 0           | 0           | 0           | 0                        | 0           | 0           | 0           | 0           | 0           | 1           | 1 | 1 |
| 888-3                     | 0                 | 0            | 1           | 1          | 1           | 0            | 0                         | 0           | 0            | 1           | 1          | 0          | 1           | 1           | 0           | 0           | 1           | 1           | 0             | 1           | 0           | 1           | 0           | 0           | 0           | 0           | 0           | 0                        | 0           | 1           | 0           | 1           | 1           | 1           | 1 |   |
| 888-4                     | 0                 | 0            | 1           | 1          | 1           | 0            | 0                         | 0           | 0            | 1           | 1          | 0          | 1           | 1           | 0           | 0           | 1           | 1           | 0             | 1           | 0           | 1           | 0           | 0           | 0           | 0           | 0           | 0                        | 0           | 0           | 0           | 0           | 0           | 1           | 1 | 1 |
| 912-1                     | 0                 | 1            | 1           | 1          | 1           | 0            | 0                         | 0           | 0            | 1           | 1          | 1          | 1           | 1           | 0           | 0           | 1           | 1           | 0             | 0           | 0           | 1           | 0           | 0           | 0           | 0           | 0           | 0                        | 0           | 1           | 1           | 1           | 1           | 1           | 1 |   |
| 912-2                     | 0                 | 1            | 1           | 1          | 1           | 0            | 0                         | 0           | 0            | 1           | 1          | 1          | 1           | 1           | 0           | 0           | 1           | 1           | 0             | 0           | 0           | 1           | 0           | 0           | 0           | 0           | 0           | 0                        | 0           | 0           | 1           | 0           | 1           | 1           | 1 |   |
| 912-3                     | 0                 | 0            | 1           | 1          | 1           | 0            | 0                         | 0           | 0            | 1           | 1          | 0          | 1           | 1           | 0           | 0           | 1           | 1           | 0             | 1           | 0           | 1           | 0           | 0           | 0           | 0           | 0           | 0                        | 0           | 1           | 0           | 0           | 1           | 1           | 1 |   |
| 912-4                     | 0                 | 1            | 1           | 1          | 1           | 0            | 0                         | 0           | 0            | 1           | 1          | 1          | 1           | 1           | 0           | 0           | 1           | 1           | 0             | 0           | 0           | 1           | 0           | 0           | 0           | 0           | 0           | 0                        | 0           | 0           | 1           | 0           | 1           | 1           | 1 |   |
| 914-1                     | 0                 | 0            | 1           | 1          | 1           | 0            | 0                         | 0           | 0            | 1           | 1          | 1          | 1           | 1           | 0           | 0           | 1           | 1           | 0             | 1           | 0           | 1           | 0           | 0           | 0           | 0           | 0           | 0                        | 0           | 0           | 1           | 0           | 1           | 1           | 1 |   |
| 914-2                     | 0                 | 0            | 1           | 1          | 1           | 0            | 0                         | 0           | 0            | 1           | 1          | 1          | 1           | 1           | 0           | 0           | 1           | 1           | 0             | 1           | 0           | 1           | 0           | 0           | 0           | 0           | 0           | 0                        | 0           | 1           | 0           | 0           | 1           | 1           | 1 |   |
| 914-3                     | 0                 | 0            | 1           | 1          | 1           | 0            | 0                         | 0           | 0            | 1           | 1          | 1          | 1           | 1           | 0           | 0           | 1           | 1           | 0             | 1           | 0           | 1           | 0           | 0           | 0           | 0           | 0           | 0                        | 0           | 0           | 0           | 0           | 0           | 1           | 1 | 1 |
| 914-4                     | 0                 | 0            | 1           | 1          | 1           | 0            | 0                         | 0           | 0            | 1           | 1          | 1          | 1           | 1           | 0           | 0           | 1           | 1           | 0             | 1           | 0           | 1           | 0           | 0           | 0           | 0           | 0           | 0                        | 0           | 0           | 0           | 0           | 0           | 1           | 1 | 1 |

<sup>a</sup> 0, no amplicon; 1, amplicon present (See Table S7 for details on genes amplified)<sup>b</sup> All isolates were Positive for following AR genes: *acrB*, *ais*, *arnA*, *emrA*, *fsr*, *macA*, *mdtH*, *mdtO*, *rarD*, *yfbH*, *yjcP*, *yjcR*All isolates were Negative for following AR genes: *aac*(3)-IV, *catA1*, *bla<sub>CTXM</sub>*, *dfrA1*, *dhfrI*, *mcr1*, *mcr2*, *mph(A)*, *qnrA*, *sul1*, *sul3*, *bla<sub>TEM</sub>*

**Table S13:** AR and integrase gene sequencing results for representative SS-O157 isolates.

| SS-O157 | Gene         | Gene Size (bp) | Sequencing (BLASTn) results                                                                |
|---------|--------------|----------------|--------------------------------------------------------------------------------------------|
| C42     | <i>acrB</i>  | 838            | aminoglycoside/multidrug transporter permease                                              |
| C45     | <i>acrB</i>  | 838            | aminoglycoside/multidrug transporter permease                                              |
| C45     | <i>ais</i>   | 362            | histidine phosphatase family protein                                                       |
| C45     | <i>arnA</i>  | 241            | bifunctional UDP-glucuronic acid oxidase/UDP-4-amino-4-deoxy-L-arabinose formyltransferase |
| C39     | <i>dfrA1</i> | 367            | DUF1338 domain-containing protein                                                          |
| C45     | <i>dfrA1</i> | 367            | DUF1338 domain-containing protein                                                          |
| C39     | <i>emrA</i>  | 901            | multidrug export protein EmrA                                                              |
| C90     | <i>Fsr</i>   | 141            | MFS transporter                                                                            |
| C39     | <i>Int</i>   | 545            | integrase                                                                                  |
| C39     | <i>macA</i>  | 791            | macrolide transporter subunit MacA                                                         |
| C42     | <i>marA</i>  | 128            | MDR efflux pump AcrAB transcriptional activator MarA                                       |
| C77     | <i>mcr1</i>  | 780            | ribonucleoside hydrolase RihC                                                              |
| C78     | <i>mcr1</i>  | 780            | ribonucleoside hydrolase RihC                                                              |
| C93     | <i>mcr1</i>  | 780            | ribonucleoside hydrolase RihC                                                              |
| C39     | <i>mdtH</i>  | 392            | MFS transporter                                                                            |
| C90     | <i>mdtO</i>  | 328            | multidrug resistance protein MdtO                                                          |
| C90     | <i>pmrD</i>  | 175            | signal transduction protein PmrD                                                           |
| C90     | <i>rarD</i>  | 370            | protein RarD                                                                               |
| C2; C45 | <i>sul1</i>  | 479            | autotransporter; adhesin                                                                   |
| C104    | <i>sul2</i>  | 348            | sulfonamide-resistant dihydropteroate synthase Sul2                                        |
| C2      | <i>sul3</i>  | 264            | C4-dicarboxylate transporter DcuC, ClpXP protease specificity-enhancing factor             |
| C4      | <i>tetA</i>  | 372            | chromosomal replication initiation protein DnaA                                            |
| C7      | <i>tetA</i>  | 372            | chromosomal replication initiation protein DnaA                                            |
| C12     | <i>tetA</i>  | 372            | chromosomal replication initiation protein DnaA                                            |
| C38     | <i>tetA</i>  | 372            | chromosomal replication initiation protein DnaA                                            |
| C90     | <i>tetA</i>  | 372            | chromosomal replication initiation protein DnaA                                            |
| C101    | <i>tetA</i>  | 372            | chromosomal replication initiation protein DnaA                                            |
| C104    | <i>tetA</i>  | 372            | chromosomal replication initiation protein DnaA                                            |
| C104    | <i>tetB</i>  | 222            | tetracycline efflux MFS transporter Tet(B)                                                 |
| C39     | <i>yfbH</i>  | 543            | 4-deoxy-4-formamido-L-arabinose-phosphoundecaprenol deformylase                            |
| C45     | <i>yjcP</i>  | 540            | multidrug resistance outer membrane protein MdtP                                           |
| C42     | <i>yjcR</i>  | 621            | multidrug transporter subunit MdtN                                                         |

**Table S14:** AR gene sequencing results for representative bovine *E. coli* isolates and control O157 strains.

| <i>E. coli</i> isolates | Gene                      | Gene Size (bp) | Sequencing (BLASTn) results                                                                 |
|-------------------------|---------------------------|----------------|---------------------------------------------------------------------------------------------|
| 912-1                   | <i>aadA1</i>              | 447            | ANT(3")-Ia family aminoglycoside nucleotidyl transferase AadA1                              |
| 912-2                   | <i>aadA1</i>              | 447            | aminoglycoside-3"-adenylyltransferase (aadA1)                                               |
| 887-1                   | <i>Ais</i>                | 362            | histidine phosphatase family protein, Polymyxin resistance protein PmrG                     |
| 888-1                   | <i>Ais</i>                | 362            | aluminum inducible protein Ais                                                              |
| 870-1                   | <i>arnA</i>               | 241            | bifunctional polymyxin resistance arnA protein                                              |
| 912-2                   | <i>arnA</i>               | 241            | bifunctional UDP-glucuronic acid oxidase/UDP-4-amino-4- deoxy-L-arabinose formyltransferase |
| 887-3                   | <i>bla<sub>CTXM</sub></i> | 499            | bifunctional chorismate mutase/prephenate dehydratase                                       |
| 887-2                   | <i>mcr1</i> (full length) | 1626           | type II secretion system protein, Gsp gene <i>E. coli</i>                                   |
| 887-3                   | <i>mcr1</i> (full length) | 1626           | allantoate amidohydrolase                                                                   |
| Sakai                   | <i>mcr1</i> (full length) | 1626           | exonuclease subunit SbcC                                                                    |
| EDL933                  | <i>mcr1</i> (full length) | 1626           | exonuclease subunit SbcC                                                                    |
| EC4115                  | <i>mcr1</i> (full length) | 1626           | exonuclease subunit SbcC                                                                    |
| JEONG-1266              | <i>mcr1</i> (full length) | 1626           | exonuclease subunit SbcC                                                                    |
| SS17                    | <i>mcr1</i> (full length) | 1626           | exonuclease subunit SbcC                                                                    |
| SS 52                   | <i>mcr1</i> (full length) | 1626           | exonuclease subunit SbcC                                                                    |
| Sakai                   | <i>sul2</i>               | 348            | sulfonamide-resistant dihydropteroate synthase Sul2                                         |
| 870-2                   | <i>sul2</i>               | 348            | sulfonamide-resistant dihydropteroate synthase Sul2                                         |
| 870-2                   | <i>tetA</i>               | 372            | tetracycline efflux protein TetA                                                            |
| 870-2                   | <i>tetA</i> (full length) | 1103           | tetracycline efflux protein TetA                                                            |
| 912-3                   | <i>tetA</i>               | 372            | tetracycline efflux protein TetA                                                            |
| 912-1                   | <i>tetB</i>               | 222            | tetracycline efflux MFS transporter Tet(B)                                                  |
| 912-2                   | <i>tetB</i>               | 222            | tetracycline efflux MFS transporter Tet(B)                                                  |
| 870-4                   | <i>tetC</i>               | 379            | tetracycline efflux MFS transporter Tet(C)                                                  |
| 888-1                   | <i>tetC</i>               | 379            | tetracycline repressor protein class C, TetC                                                |

**Table S15.** *Stx2* gene: Estimates of evolutionary divergence<sup>a</sup> over sequence pairs between two groups and within each group.

| Comparison groups                              | Genetic Distance/Base substitution per site |
|------------------------------------------------|---------------------------------------------|
| Overall mean genetic distance                  | 0.021                                       |
| Mean diversity in entire population            | 0.022                                       |
| Mean diversity within subpopulations           | 0.008                                       |
| Mean inter population diversity                | 0.015                                       |
| Between <i>E. coli</i> and control O157 groups | 0.029                                       |
| Between <i>E. coli</i> and SS O157 groups      | 0.038                                       |
| Between control O157 and SS O157 groups        | 0.011                                       |
| Within <i>E. coli</i> isolates group           | 0.012                                       |
| Within control O157 isolates group             | 0.006                                       |
| Within SS O157 isolates group                  | 0.005                                       |

<sup>a</sup>Genetic distance (evolutionary divergence) and rate variation among sites analyses were conducted using the maximum likelihood statistical method and Jukes-Cantor nucleotide substitution model with a gamma distribution (shape parameter = 0.5)
